# Supplementary material for: Surprising torsional barrier reduction in the coupled methyl internal rotations of 2,3-dimethylfuran observed by microwave spectroscopy
Source: Royal Society of Chemistry journal article supplement (doi:10.1039/d4cp03338h), 2024-01-01
Supplement: d4cp03338h1.pdf [file d4cp03338h1.pdf]

## Supplementary Materials

### **Surprising torsional barrier reduction in the coupled methyl internal rotations of 2,3-dimethylfuran observed by microwave spectroscopy**

Mike Buttkus-Barth,<sup>a</sup> Thi Ha Nguyen,<sup>b</sup> Gregor Brannys,<sup>c</sup> Arne Lüchow<sup>c</sup>  
and Ha Vinh Lam Nguyen<sup>†a,d</sup>

---

<sup>a</sup> Univ Paris Est Creteil and Université Paris Cité, CNRS, LISA, F-94010 Créteil, France.

<sup>b</sup> Faculty of Chemical Engineering, Industrial University of Ho Chi Minh City, 12 Nguyen Van Bao Street, Go Vap District, Ho Chi Minh City, 70000, Viet Nam.

<sup>c</sup> Institut für Physikalische Chemie, RWTH Aachen University, Aachen, Germany.

<sup>d</sup> Institut Universitaire de France (IUF), F-75231 Paris, France.

† Corresponding author. Email: [lam.nguyen@lisa.ipsl.fr](mailto:lam.nguyen@lisa.ipsl.fr)

**Table S-1.** Nuclear coordinates in the principal axis system of 23DMF calculated at the MP2/6-311++G(d,p) and B3LYP-D3BJ/6-311++G(d,p) levels of theory. The atoms are numbered according to Figure 1.

|            | MP2/6-311++G(d,p) |                |                | B3LYP-D3BJ/6-311++G(d,p) |                |                |
|------------|-------------------|----------------|----------------|--------------------------|----------------|----------------|
|            | $a / \text{Å}$    | $b / \text{Å}$ | $c / \text{Å}$ | $a / \text{Å}$           | $b / \text{Å}$ | $c / \text{Å}$ |
| <b>O1</b>  | 1.243934          | 0.750359       | 0.000106       | 1.220931                 | 0.782929       | 0.000076       |
| <b>C2</b>  | -0.121685         | 0.689216       | -0.000012      | -0.147486                | 0.685223       | 0.000024       |
| <b>C3</b>  | -0.539327         | -0.622526      | -0.000007      | -0.520891                | -0.627249      | -0.000045      |
| <b>C4</b>  | 0.658776          | -1.411778      | 0.000061       | 0.703309                 | -1.385482      | 0.000292       |
| <b>C5</b>  | 1.706756          | -0.529673      | -0.000129      | 1.719894                 | -0.486910      | -0.000282      |
| <b>H6</b>  | 2.779970          | -0.643824      | -0.000223      | 2.792797                 | -0.573266      | -0.000496      |
| <b>H7</b>  | 0.730906          | -2.491107      | 0.000110       | 0.796951                 | -2.460453      | 0.000514       |
| <b>C8</b>  | -1.957944         | -1.117866      | -0.000004      | -1.917855                | -1.176639      | -0.000101      |
| <b>H9</b>  | -1.978079         | -2.210539      | -0.000259      | -1.900409                | -2.268017      | -0.000422      |
| <b>H10</b> | -2.504087         | -0.776109      | 0.885041       | -2.480497                | -0.858278      | 0.882512       |
| <b>H11</b> | -2.504239         | -0.775691      | -0.884793      | -2.480661                | -0.857752      | -0.882418      |
| <b>C12</b> | -0.849596         | 1.987074       | -0.000030      | -0.909244                | 1.959274       | 0.000029       |
| <b>H13</b> | -1.926305         | 1.800316       | -0.000017      | -1.980088                | 1.750800       | -0.000007      |
| <b>H14</b> | -0.603407         | 2.580598       | 0.886427       | -0.678922                | 2.563273       | 0.883421       |
| <b>H15</b> | -0.603424         | 2.580569       | -0.886514      | -0.678869                | 2.563302       | -0.883329      |

**Table S-2a.** Rotational constants of 23DMF (in MHz) predicted at various levels of theory. The differences between the calculated and the experimental values (in MHz) are given as  $\Delta A$ ,  $\Delta B$  and  $\Delta C$ .  $\Sigma$  is the sum of the absolute values of  $\Delta A$ ,  $\Delta B$  and  $\Delta C$ .

| Method/Basis set             | <i>A</i> | $\Delta A$ | <i>B</i> | $\Delta B$ | <i>C</i> | $\Delta C$ | $\Sigma$ |
|------------------------------|----------|------------|----------|------------|----------|------------|----------|
| B3LYP-D3/6-31G(d,p)          | 3570.9   | 18.4       | 3245.5   | -22.7      | 1737.0   | -1.7       | 42.9     |
| B3LYP-D3/6-31+G(d,p)         | 3564.2   | 11.7       | 3239.9   | -28.2      | 1733.9   | -4.8       | 44.8     |
| B3LYP-D3/6-31++G(d,p)        | 3564.2   | 11.7       | 3240.0   | -28.2      | 1733.9   | -4.8       | 44.7     |
| B3LYP-D3/6-311G(d,p)         | 3580.7   | 28.2       | 3252.8   | -15.4      | 1741.3   | 2.6        | 46.2     |
| B3LYP-D3/6-311+G(d,p)        | 3579.8   | 27.3       | 3250.0   | -18.2      | 1740.4   | 1.7        | 47.2     |
| B3LYP-D3/6-311++G(d,p)       | 3579.8   | 27.3       | 3250.0   | -18.2      | 1740.4   | 1.7        | 47.1     |
| B3LYP-D3/6-311G(2d,2p)       | 3592.3   | 39.8       | 3260.6   | -7.6       | 1746.1   | 7.4        | 54.8     |
| B3LYP-D3/6-311+G(2d,2p)      | 3591.4   | 38.9       | 3258.0   | -10.2      | 1745.2   | 6.5        | 55.5     |
| B3LYP-D3/6-311++G(2d,2p)     | 3591.5   | 39.0       | 3257.9   | -10.3      | 1745.2   | 6.5        | 55.7     |
| B3LYP-D3/6-311G(df,pd)       | 3591.9   | 39.4       | 3262.8   | -5.4       | 1746.8   | 8.1        | 52.9     |
| B3LYP-D3/6-311+G(df,pd)      | 3589.7   | 37.2       | 3260.7   | -7.5       | 1745.7   | 7.0        | 51.6     |
| B3LYP-D3/6-311++G(df,pd)     | 3589.8   | 37.3       | 3260.7   | -7.5       | 1745.7   | 7.0        | 51.7     |
| B3LYP-D3/6-311G(2df,2pd)     | 3596.8   | 44.3       | 3265.8   | -2.4       | 1748.6   | 9.9        | 56.6     |
| B3LYP-D3/6-311+G(2df,2pd)    | 3595.3   | 42.8       | 3263.4   | -4.8       | 1747.6   | 8.9        | 56.5     |
| B3LYP-D3/6-311++G(2df,2pd)   | 3595.4   | 42.9       | 3263.4   | -4.8       | 1747.6   | 8.9        | 56.6     |
| B3LYP-D3/6-311G(3df,3pd)     | 3596.0   | 43.5       | 3267.8   | -0.4       | 1749.1   | 10.4       | 54.2     |
| B3LYP-D3/6-311+G(3df,3pd)    | 3596.9   | 44.4       | 3264.3   | -3.9       | 1748.3   | 9.6        | 57.8     |
| B3LYP-D3/6-311++G(3df,3pd)   | 3596.8   | 44.3       | 3264.3   | -3.8       | 1748.3   | 9.6        | 57.7     |
| B3LYP-D3/cc-pVDZ             | 3565.0   | 12.5       | 3236.3   | -31.9      | 1733.4   | -5.3       | 49.7     |
| B3LYP-D3/aug-cc-pVDZ         | 3565.9   | 13.4       | 3233.7   | -34.5      | 1732.8   | -5.9       | 53.8     |
| B3LYP-D3/cc-pVTZ             | 3594.5   | 42.0       | 3264.0   | -4.2       | 1747.6   | 8.9        | 55.1     |
| B3LYP-D3/aug-cc-pVTZ         | 3594.3   | 41.8       | 3263.2   | -5.0       | 1747.3   | 8.6        | 55.4     |
|                              |          |            |          |            |          |            |          |
| B3LYP-D3BJ/6-31G(d,p)        | 3569.1   | 16.6       | 3247.0   | -21.2      | 1736.9   | -1.8       | 39.6     |
| B3LYP-D3BJ/6-31+G(d,p)       | 3562.5   | 10.0       | 3241.5   | -26.7      | 1733.9   | -4.8       | 41.5     |
| B3LYP-D3BJ/6-31++G(d,p)      | 3562.4   | 9.9        | 3241.5   | -26.7      | 1733.9   | -4.8       | 41.4     |
| B3LYP-D3BJ/6-311G(d,p)       | 3579.8   | 27.3       | 3253.7   | -14.5      | 1741.4   | 2.7        | 44.4     |
| B3LYP-D3BJ/6-311+G(d,p)      | 3576.8   | 24.3       | 3251.7   | -16.4      | 1740.1   | 1.4        | 42.1     |
| B3LYP-D3BJ/6-311++G(d,p)     | 3576.8   | 24.3       | 3251.7   | -16.4      | 1740.1   | 1.4        | 42.1     |
| B3LYP-D3BJ/6-311G(2d,2p)     | 3590.2   | 37.7       | 3261.8   | -6.4       | 1745.9   | 7.2        | 51.3     |
| B3LYP-D3BJ/6-311+G(2d,2p)    | 3589.4   | 36.9       | 3259.2   | -8.9       | 1745.0   | 6.3        | 52.2     |
| B3LYP-D3BJ/6-311++G(2d,2p)   | 3589.5   | 37.0       | 3259.2   | -9.0       | 1745.0   | 6.3        | 52.4     |
| B3LYP-D3BJ/6-311G(df,pd)     | 3589.9   | 37.4       | 3263.9   | -4.3       | 1746.6   | 7.9        | 49.6     |
| B3LYP-D3BJ/6-311+G(df,pd)    | 3587.6   | 35.1       | 3262.0   | -6.2       | 1745.5   | 6.8        | 48.1     |
| B3LYP-D3BJ/6-311++G(df,pd)   | 3587.8   | 35.3       | 3262.0   | -6.2       | 1745.5   | 6.8        | 48.3     |
| B3LYP-D3BJ/6-311G(2df,2pd)   | 3594.7   | 42.1       | 3267.0   | -1.2       | 1748.5   | 9.8        | 53.1     |
| B3LYP-D3BJ/6-311+G(2df,2pd)  | 3593.3   | 40.8       | 3264.6   | -3.6       | 1747.5   | 8.8        | 53.1     |
| B3LYP-D3BJ/6-311++G(2df,2pd) | 3593.3   | 40.8       | 3264.6   | -3.6       | 1747.5   | 8.8        | 53.2     |
| B3LYP-D3BJ/6-311G(3df,3pd)   | 3593.8   | 41.3       | 3269.0   | 0.8        | 1748.9   | 10.2       | 52.3     |

|                              |        |       |        |       |        |       |       |
|------------------------------|--------|-------|--------|-------|--------|-------|-------|
| B3LYP-D3BJ/6-311+G(3df,3pd)  | 3594.8 | 42.3  | 3265.5 | -2.7  | 1748.1 | 9.4   | 54.3  |
| B3LYP-D3BJ/6-311++G(3df,3pd) | 3594.7 | 42.2  | 3265.5 | -2.7  | 1748.1 | 9.4   | 54.3  |
| B3LYP-D3BJ/cc-pVDZ           | 3563.3 | 10.8  | 3237.9 | -30.3 | 1733.4 | -5.3  | 46.4  |
| B3LYP-D3BJ/aug-cc-pVDZ       | 3564.3 | 11.8  | 3235.3 | -32.9 | 1732.8 | -5.9  | 50.6  |
| B3LYP-D3BJ/cc-pVTZ           | 3592.4 | 39.9  | 3265.2 | -3.0  | 1747.4 | 8.7   | 51.6  |
| B3LYP-D3BJ/aug-cc-pVTZ       | 3592.2 | 39.7  | 3264.4 | -3.8  | 1747.2 | 8.5   | 51.9  |
|                              |        |       |        |       |        |       |       |
| CAM-B3LYP-D3BJ/6-311G(d,p)   | 3604.3 | 51.8  | 3276.8 | 8.7   | 1753.8 | 15.0  | 75.5  |
| CAM-B3LYP-D3BJ/6-311+G(d,p)  | 3602.4 | 49.9  | 3274.5 | 6.3   | 1752.6 | 13.9  | 70.1  |
| CAM-B3LYP-D3BJ/6-311++G(d,p) | 3602.4 | 49.9  | 3274.5 | 6.3   | 1752.6 | 13.9  | 70.1  |
| CAM-B3LYP-D3BJ/cc-pVDZ       | 3587.4 | 34.9  | 3260.6 | -7.6  | 1745.6 | 6.9   | 49.4  |
| CAM-B3LYP-D3BJ/aug-cc-pVDZ   | 3589.1 | 36.6  | 3257.8 | -10.4 | 1745.1 | 6.4   | 53.3  |
| CAM-B3LYP-D3BJ/cc-pVTZ       | 3618.8 | 66.3  | 3287.3 | 19.1  | 1760.0 | 21.3  | 106.7 |
| CAM-B3LYP-D3BJ/aug-cc-pVTZ   | 3618.5 | 66.0  | 3286.4 | 18.2  | 1759.7 | 21.0  | 105.2 |
| CCSD/cc-pVDZ                 | 3540.1 | -12.4 | 3212.7 | -55.4 | 1721.1 | -17.6 | 85.5  |
|                              |        |       |        |       |        |       |       |
| M06-2X/6-31G(d,p)            | 3600.6 | 48.1  | 3262.1 | -6.1  | 1748.8 | 10.1  | 64.3  |
| M06-2X/6-31+G(d,p)           | 3593.3 | 40.8  | 3258.5 | -9.7  | 1746.1 | 7.4   | 57.8  |
| M06-2X/6-31++G(d,p)          | 3593.2 | 40.7  | 3258.6 | -9.6  | 1746.1 | 7.4   | 57.7  |
| M06-2X/6-311G(d,p)           | 3611.5 | 59.0  | 3265.2 | -3.0  | 1752.2 | 13.5  | 75.4  |
| M06-2X/6-311+G(d,p)          | 3609.1 | 56.6  | 3263.8 | -4.4  | 1751.3 | 12.6  | 73.5  |
| M06-2X/6-311++G(d,p)         | 3609.1 | 56.6  | 3263.8 | -4.4  | 1751.3 | 12.6  | 73.5  |
| M06-2X/6-311G(df,pd)         | 3620.0 | 67.5  | 3273.2 | 5.1   | 1756.4 | 17.7  | 90.3  |
| M06-2X/6-311+G(df,pd)        | 3618.4 | 65.8  | 3271.8 | 3.6   | 1755.6 | 16.9  | 86.4  |
| M06-2X/6-311++G(df,pd)       | 3618.4 | 65.9  | 3271.8 | 3.6   | 1755.6 | 16.9  | 86.4  |
| M06-2X/6-311G(3df,3pd)       | 3625.8 | 73.3  | 3277.2 | 9.0   | 1758.8 | 20.1  | 102.4 |
| M06-2X/6-311+G(3df,3pd)      | 3626.6 | 74.1  | 3274.3 | 6.2   | 1758.2 | 19.5  | 99.7  |
| M06-2X/6-311++G(3df,3pd)     | 3626.5 | 74.0  | 3274.3 | 6.1   | 1758.2 | 19.5  | 99.6  |
| M06-2X/cc-pVDZ               | 3594.9 | 42.4  | 3255.4 | -12.8 | 1745.9 | 7.2   | 62.4  |
| M06-2X/aug-cc-pVDZ           | 3597.9 | 45.4  | 3251.7 | -16.5 | 1745.5 | 6.8   | 68.7  |
| M06-2X/cc-pVTZ               | 3625.0 | 72.5  | 3273.7 | 5.6   | 1757.6 | 18.9  | 97.0  |
| M06-2X/aug-cc-pVTZ           | 3625.7 | 73.2  | 3273.3 | 5.1   | 1757.7 | 19.0  | 97.2  |
|                              |        |       |        |       |        |       |       |
| M06-2X-D3/6-31G(d,p)         | 3600.1 | 47.6  | 3262.1 | -6.0  | 1748.7 | 10.0  | 63.6  |
| M06-2X-D3/6-31+G(d,p)        | 3592.7 | 40.2  | 3258.5 | -9.6  | 1746.0 | 7.3   | 57.1  |
| M06-2X-D3/6-31++G(d,p)       | 3592.6 | 40.1  | 3258.6 | -9.6  | 1746.0 | 7.3   | 57.0  |
| M06-2X-D3/6-311G(d,p)        | 3610.9 | 58.4  | 3265.2 | -2.9  | 1752.1 | 13.4  | 74.7  |
| M06-2X-D3/6-311+G(d,p)       | 3608.5 | 56.0  | 3263.8 | -4.3  | 1751.1 | 12.4  | 72.8  |
| M06-2X-D3/6-311++G(d,p)      | 3608.5 | 56.0  | 3263.8 | -4.3  | 1751.1 | 12.4  | 72.8  |
| M06-2X-D3/6-311G(2d,2p)      | 3623.5 | 71.0  | 3270.6 | 2.4   | 1756.4 | 17.7  | 91.1  |
| M06-2X-D3/6-311+G(2d,2p)     | 3622.2 | 69.7  | 3268.8 | 0.6   | 1755.6 | 16.9  | 87.2  |
| M06-2X-D3/6-311++G(2d,2p)    | 3622.3 | 69.8  | 3268.7 | 0.5   | 1755.6 | 16.9  | 87.2  |
| M06-2X-D3/6-311G(df,pd)      | 3619.4 | 66.9  | 3273.3 | 5.1   | 1756.3 | 17.6  | 89.6  |
| M06-2X-D3/6-311+G(df,pd)     | 3617.8 | 65.3  | 3271.8 | 3.6   | 1755.5 | 16.8  | 85.7  |
| M06-2X-D3/6-311G(2df,2pd)    | 3626.2 | 73.7  | 3275.3 | 7.1   | 1758.4 | 19.7  | 100.5 |

|                             |        |      |        |       |        |      |       |
|-----------------------------|--------|------|--------|-------|--------|------|-------|
| M06-2X-D3/6-311+G(2df,2pd)  | 3624.7 | 72.2 | 3273.7 | 5.5   | 1757.5 | 18.8 | 96.5  |
| M06-2X-D3/6-311++G(2df,2pd) | 3624.7 | 72.2 | 3273.6 | 5.5   | 1757.5 | 18.8 | 96.5  |
| M06-2X-D3/6-311G(3df,3pd)   | 3625.2 | 72.6 | 3277.2 | 9.0   | 1758.7 | 20.0 | 101.7 |
| M06-2X-D3/6-311+G(3df,3pd)  | 3626.0 | 73.5 | 3274.4 | 6.2   | 1758.0 | 19.3 | 99.0  |
| M06-2X-D3/6-311++G(3df,3pd) | 3625.9 | 73.4 | 3274.3 | 6.2   | 1758.0 | 19.3 | 98.9  |
| M06-2X-D3/cc-pVDZ           | 3594.4 | 41.9 | 3255.4 | -12.8 | 1745.8 | 7.1  | 61.7  |
| M06-2X-D3/aug-cc-pVDZ       | 3597.4 | 44.9 | 3251.7 | -16.5 | 1745.4 | 6.7  | 68.0  |
| M06-2X-D3/cc-pVTZ           | 3624.4 | 71.9 | 3273.8 | 5.6   | 1757.5 | 18.8 | 96.2  |
| M06-2X-D3/aug-cc-pVTZ       | 3625.1 | 72.6 | 3273.3 | 5.1   | 1757.5 | 18.8 | 96.5  |
|                             |        |      |        |       |        |      |       |
| MN15/6-31G(d,p)             | 3599.8 | 47.3 | 3250.4 | -17.8 | 1745.2 | 6.5  | 71.6  |
| MN15/6-31+G(d,p)            | 3590.1 | 37.6 | 3246.9 | -21.3 | 1742.0 | 3.3  | 62.3  |
| MN15/6-31++G(d,p)           | 3590.2 | 37.7 | 3246.8 | -21.4 | 1742.0 | 3.3  | 62.4  |
| MN15/6-311G(d,p)            | 3615.9 | 63.4 | 3259.2 | -9.0  | 1751.5 | 12.8 | 85.2  |
| MN15/6-311+G(d,p)           | 3613.9 | 61.4 | 3257.3 | -10.9 | 1750.5 | 11.7 | 84.1  |
| MN15/6-311++G(d,p)          | 3614.2 | 61.7 | 3257.2 | -11.0 | 1750.5 | 11.8 | 84.5  |
| MN15/6-311G(2d,2p)          | 3626.1 | 73.6 | 3264.3 | -3.9  | 1755.1 | 16.4 | 93.9  |
| MN15/6-311+G(2d,2p)         | 3624.3 | 71.8 | 3262.6 | -5.6  | 1754.2 | 15.5 | 92.9  |
| MN15/6-311++G(2d,2p)        | 3624.6 | 72.1 | 3262.5 | -5.7  | 1754.3 | 15.6 | 93.3  |
| MN15/6-311G(df,pd)          | 3628.4 | 75.9 | 3269.9 | 1.7   | 1757.4 | 18.7 | 96.3  |
| MN15/6-311+G(df,pd)         | 3627.1 | 74.6 | 3267.4 | -0.8  | 1756.3 | 17.6 | 93.0  |
| MN15/6-311G(2df,2pd)        | 3632.0 | 79.4 | 3268.9 | 0.8   | 1757.8 | 19.1 | 99.3  |
| MN15/6-311+G(2df,2pd)       | 3629.9 | 77.4 | 3267.4 | -0.8  | 1756.9 | 18.2 | 96.4  |
| MN15/6-311++G(2df,2pd)      | 3630.2 | 77.7 | 3267.3 | -0.9  | 1756.9 | 18.2 | 96.8  |
| MN15/6-311G(3df,3pd)        | 3634.3 | 81.8 | 3271.6 | 3.4   | 1759.1 | 20.4 | 105.6 |
| MN15/6-311+G(3df,3pd)       | 3634.6 | 82.1 | 3268.5 | 0.3   | 1758.3 | 19.6 | 102.0 |
| MN15/6-311++G(3df,3pd)      | 3634.7 | 82.1 | 3268.5 | 0.3   | 1758.3 | 19.6 | 102.1 |
| MN15/cc-pVDZ                | 3596.6 | 44.1 | 3245.0 | -23.2 | 1743.2 | 4.5  | 71.8  |
| MN15/aug-cc-pVDZ            | 3600.7 | 48.2 | 3242.3 | -25.9 | 1743.4 | 4.7  | 78.8  |
| MN15/cc-pVTZ                | 3631.8 | 79.3 | 3267.7 | -0.5  | 1757.4 | 18.7 | 98.5  |
| MN15/aug-cc-pVTZ            | 3633.0 | 80.5 | 3269.0 | 0.8   | 1758.1 | 19.4 | 100.8 |
|                             |        |      |        |       |        |      |       |
| MP2/6-31G(d,p)              | 3565.9 | 13.4 | 3257.3 | -10.9 | 1739.0 | 0.3  | 24.6  |
| MP2/6-31+G(d,p)             | 3557.7 | 5.2  | 3248.0 | -20.2 | 1734.5 | -4.2 | 29.7  |
| MP2/6-31++G(d,p)            | 3558.4 | 5.9  | 3247.4 | -20.8 | 1734.5 | -4.2 | 30.8  |
| MP2/6-311G(d,p)             | 3573.0 | 20.5 | 3248.0 | -20.2 | 1738.4 | -0.4 | 41.1  |
| MP2/6-311+G(d,p)            | 3567.1 | 14.5 | 3243.9 | -24.3 | 1735.8 | -2.9 | 41.7  |
| MP2/6-311++G(d,p)           | 3567.1 | 14.5 | 3243.9 | -24.3 | 1735.8 | -2.9 | 41.7  |
| MP2/6-311G(2d,2p)           | 3589.4 | 36.9 | 3255.4 | -12.8 | 1743.8 | 5.1  | 54.8  |
| MP2/6-311+G(2d,2p)          | 3585.4 | 32.9 | 3252.4 | -15.8 | 1742.1 | 3.4  | 52.0  |
| MP2/6-311++G(2d,2p)         | 3585.6 | 33.1 | 3252.2 | -15.9 | 1742.1 | 3.4  | 52.5  |
| MP2/6-311G(df,pd)           | 3599.2 | 46.7 | 3268.8 | 0.6   | 1750.3 | 11.6 | 58.9  |
| MP2/6-311+G(df,pd)          | 3592.9 | 40.4 | 3265.1 | -3.1  | 1747.8 | 9.1  | 52.7  |
| MP2/6-311++G(df,pd)         | 3593.4 | 40.9 | 3264.9 | -3.3  | 1747.9 | 9.2  | 53.4  |
| MP2/6-311G(2df,2pd)         | 3604.7 | 52.2 | 3272.7 | 4.5   | 1752.5 | 13.8 | 70.5  |

|                          |        |       |        |       |        |       |       |
|--------------------------|--------|-------|--------|-------|--------|-------|-------|
| MP2/6-311+G(2df,2pd)     | 3600.4 | 47.9  | 3269.5 | 1.3   | 1750.6 | 11.9  | 61.1  |
| MP2/6-311++G(2df,2pd)    | 3600.6 | 48.0  | 3269.4 | 1.2   | 1750.6 | 11.9  | 61.2  |
| MP2/6-311G(3df,3pd)      | 3598.0 | 45.5  | 3272.0 | 3.8   | 1750.8 | 12.1  | 61.3  |
| MP2/6-311+G(3df,3pd)     | 3596.9 | 44.4  | 3268.1 | -0.1  | 1749.4 | 10.7  | 55.2  |
| MP2/6-311++G(3df,3pd)    | 3596.9 | 44.3  | 3268.1 | -0.1  | 1749.4 | 10.7  | 55.1  |
| MP2/cc-pVDZ              | 3542.8 | -9.7  | 3222.4 | -45.8 | 1724.4 | -14.3 | 69.8  |
| MP2/aug-cc-pVDZ          | 3528.8 | -23.8 | 3210.5 | -57.7 | 1717.7 | -21.0 | 102.5 |
| MP2/cc-pVTZ              | 3596.3 | 43.8  | 3265.6 | -2.6  | 1748.5 | 9.8   | 56.2  |
| MP2/aug-cc-pVTZ          | 3592.9 | 40.4  | 3263.4 | -4.8  | 1747.2 | 8.4   | 53.6  |
|                          |        |       |        |       |        |       |       |
| PBE0/6-31G(d,p)          | 3531.6 | -20.9 | 3225.8 | -42.3 | 1722.5 | -16.2 | 79.5  |
| PBE0/6-31+G(d,p)         | 3524.2 | -28.3 | 3221.0 | -47.2 | 1719.5 | -19.2 | 94.7  |
| PBE0/6-31++G(d,p)        | 3524.3 | -28.2 | 3221.0 | -47.2 | 1719.5 | -19.2 | 94.6  |
| PBE0/6-311G(d,p)         | 3542.7 | -9.8  | 3234.1 | -34.0 | 1727.5 | -11.2 | 55.1  |
| PBE0/6-311+G(d,p)        | 3540.4 | -12.1 | 3231.8 | -36.4 | 1726.3 | -12.4 | 61.0  |
| PBE0/6-311++G(d,p)       | 3540.5 | -12.0 | 3231.8 | -36.4 | 1726.3 | -12.4 | 60.9  |
| PBE0/6-311G(2d,2p)       | 3550.5 | -2.0  | 3240.5 | -27.7 | 1730.9 | -7.8  | 37.5  |
| PBE0/6-311+G(2d,2p)      | 3549.4 | -3.1  | 3238.1 | -30.1 | 1730.0 | -8.7  | 41.8  |
| PBE0/6-311++G(2d,2p)     | 3549.5 | -3.0  | 3238.0 | -30.2 | 1730.0 | -8.7  | 41.8  |
| PBE0/6-311G(df,pd)       | 3552.6 | 0.1   | 3243.4 | -24.8 | 1732.4 | -6.3  | 31.2  |
| PBE0/6-311+G(df,pd)      | 3550.9 | -1.6  | 3240.9 | -27.3 | 1731.3 | -7.4  | 36.3  |
| PBE0/6-311G(2df,2pd)     | 3555.8 | 3.3   | 3245.1 | -23.1 | 1733.5 | -5.2  | 31.6  |
| PBE0/6-311+G(2df,2pd)    | 3554.3 | 1.7   | 3242.8 | -25.4 | 1732.5 | -6.2  | 33.4  |
| PBE0/6-311++G(2df,2pd)   | 3553.6 | 1.1   | 3243.2 | -25.0 | 1732.5 | -6.2  | 32.3  |
| PBE0/6-311G(3df,3pd)     | 3555.5 | 3.0   | 3247.5 | -20.7 | 1734.2 | -4.6  | 28.3  |
| PBE0/6-311+G(3df,3pd)    | 3556.7 | 4.2   | 3243.9 | -24.3 | 1733.4 | -5.3  | 33.8  |
| PBE0/6-311++G(3df,3pd)   | 3556.7 | 4.2   | 3243.9 | -24.3 | 1733.4 | -5.3  | 33.8  |
| PBE0/cc-pVDZ             | 3528.0 | -24.5 | 3219.2 | -49.0 | 1720.1 | -18.6 | 92.1  |
| PBE0/aug-cc-pVDZ         | 3527.7 | -24.8 | 3216.1 | -52.0 | 1719.1 | -19.6 | 96.4  |
| PBE0/cc-pVTZ             | 3552.6 | 0.1   | 3243.6 | -24.6 | 1732.4 | -6.3  | 31.1  |
| PBE0/aug-cc-pVTZ         | 3552.2 | -0.4  | 3242.9 | -25.3 | 1732.1 | -6.7  | 32.3  |
|                          |        |       |        |       |        |       |       |
| PBE0-D3/6-31G(d,p)       | 3537.7 | -14.8 | 3224.1 | -44.1 | 1723.4 | -15.3 | 74.2  |
| PBE0-D3/6-31+G(d,p)      | 3530.4 | -22.1 | 3219.2 | -48.9 | 1720.4 | -18.3 | 89.4  |
| PBE0-D3/6-31++G(d,p)     | 3530.4 | -22.1 | 3219.2 | -49.0 | 1720.4 | -18.3 | 89.3  |
| PBE0-D3/6-311G(d,p)      | 3548.8 | -3.7  | 3232.4 | -35.8 | 1728.4 | -10.3 | 49.8  |
| PBE0-D3/6-311+G(d,p)     | 3546.5 | -6.0  | 3230.0 | -38.2 | 1727.2 | -11.5 | 55.7  |
| PBE0-D3/6-311++G(d,p)    | 3546.6 | -5.9  | 3229.9 | -38.2 | 1727.2 | -11.5 | 55.6  |
| PBE0-D3/6-311G(2d,2p)    | 3556.6 | 4.1   | 3238.7 | -29.5 | 1731.9 | -6.8  | 40.4  |
| PBE0-D3/6-311+G(2d,2p)   | 3555.5 | 3.0   | 3236.3 | -31.9 | 1731.0 | -7.7  | 42.7  |
| PBE0-D3/6-311++G(2d,2p)  | 3555.6 | 3.1   | 3236.2 | -32.0 | 1731.0 | -7.7  | 42.8  |
| PBE0-D3/6-311G(df,pd)    | 3558.7 | 6.1   | 3241.6 | -26.6 | 1733.3 | -5.4  | 38.1  |
| PBE0-D3/6-311+G(df,pd)   | 3557.0 | 4.5   | 3239.1 | -29.1 | 1732.2 | -6.5  | 40.0  |
| PBE0-D3/6-311G(2df,2pd)  | 3561.9 | 9.4   | 3243.3 | -24.9 | 1734.5 | -4.2  | 38.5  |
| PBE0-D3/6-311+G(2df,2pd) | 3560.4 | 7.9   | 3241.0 | -27.2 | 1733.5 | -5.3  | 40.4  |

|                                    |               |       |               |       |               |       |       |
|------------------------------------|---------------|-------|---------------|-------|---------------|-------|-------|
| PBE0-D3/6-311++G(2df,2pd)          | 3560.4        | 7.9   | 3240.9        | -27.3 | 1733.5        | -5.2  | 40.4  |
| PBE0-D3/6-311G(3df,3pd)            | 3561.6        | 9.1   | 3245.7        | -22.5 | 1735.1        | -3.6  | 35.2  |
| PBE0-D3/6-311+G(3df,3pd)           | 3562.8        | 10.3  | 3242.0        | -26.1 | 1734.4        | -4.4  | 40.8  |
| PBE0-D3/6-311++G(3df,3pd)          | 3562.8        | 10.3  | 3242.0        | -26.1 | 1734.3        | -4.4  | 40.8  |
| PBE0-D3/cc-pVDZ                    | 3533.8        | -18.7 | 3217.5        | -50.7 | 1721.0        | -17.7 | 87.0  |
| PBE0-D3/aug-cc-pVDZ                | 3533.8        | -18.7 | 3214.3        | -53.8 | 1720.1        | -18.6 | 91.2  |
| PBE0-D3/cc-pVTZ                    | 3559.4        | 6.9   | 3241.3        | -26.9 | 1733.3        | -5.4  | 39.1  |
| PBE0-D3/aug-cc-pVTZ                | 3558.3        | 5.8   | 3241.0        | -27.2 | 1733.0        | -5.7  | 38.7  |
| $\omega$ B97X-D /6-31G(d,p)        | 3597.1        | 44.6  | 3264.4        | -3.8  | 1748.6        | 9.9   | 58.3  |
| $\omega$ B97X-D /6-31+G(d,p)       | 3591.2        | 38.7  | 3260.6        | -7.6  | 1746.2        | 7.5   | 53.8  |
| $\omega$ B97X-D /6-31++G(d,p)      | 3591.1        | 38.6  | 3260.7        | -7.5  | 1746.2        | 7.5   | 53.6  |
| $\omega$ B97X-D /6-311G(d,p)       | 3607.1        | 54.6  | 3269.2        | 1.0   | 1752.4        | 13.7  | 69.2  |
| $\omega$ B97X-D /6-311+G(d,p)      | 3607.1        | 54.5  | 3269.2        | 1.0   | 1752.3        | 13.6  | 69.2  |
| $\omega$ B97X-D /6-311++G(d,p)     | 3609.4        | 56.9  | 3270.8        | 2.6   | 1753.4        | 14.7  | 74.2  |
| $\omega$ B97X-D /6-311G(2d,2p)     | 3620.3        | 67.8  | 3277.4        | 9.3   | 1757.6        | 18.9  | 96.0  |
| $\omega$ B97X-D /6-311+G(2d,2p)    | 3619.0        | 66.5  | 3275.5        | 7.3   | 1756.8        | 18.1  | 91.9  |
| $\omega$ B97X-D /6-311++G(2d,2p)   | 3619.1        | 66.6  | 3275.4        | 7.3   | 1756.8        | 18.1  | 91.9  |
| $\omega$ B97X-D /6-311G(df,pd)     | 3618.8        | 66.3  | 3280.1        | 11.9  | 1758.1        | 19.4  | 97.6  |
| $\omega$ B97X-D /6-311+G(df,pd)    | 3616.9        | 64.4  | 3278.3        | 10.1  | 1757.2        | 18.5  | 93.0  |
| $\omega$ B97X-D /6-311G(2df,2pd)   | 3624.1        | 71.6  | 3282.3        | 14.1  | 1759.9        | 21.2  | 106.8 |
| $\omega$ B97X-D /6-311+G(2df,2pd)  | 3622.4        | 69.9  | 3280.5        | 12.3  | 1759.0        | 20.3  | 102.5 |
| $\omega$ B97X-D /6-311++G(2df,2pd) | 3622.4        | 69.9  | 3280.5        | 12.3  | 1759.0        | 20.3  | 102.5 |
| $\omega$ B97X-D /6-311G(3df,3pd)   | 3623.7        | 71.2  | 3284.1        | 15.9  | 1760.3        | 21.6  | 108.7 |
| $\omega$ B97X-D /6-311+G(3df,3pd)  | 3624.2        | 71.7  | 3281.4        | 13.2  | 1759.7        | 21.0  | 105.9 |
| $\omega$ B97X-D /6-311++G(3df,3pd) | 3624.1        | 71.6  | 3281.4        | 13.2  | 1759.7        | 21.0  | 105.8 |
| $\omega$ B97X-D /cc-pVDZ           | 3589.2        | 36.7  | 3256.3        | -11.8 | 1744.9        | 6.2   | 54.7  |
| $\omega$ B97X-D /aug-cc-pVDZ       | 3591.5        | 39.0  | 3253.0        | -15.2 | 1744.4        | 5.7   | 59.9  |
| $\omega$ B97X-D /cc-pVTZ           | 3622.4        | 69.9  | 3281.8        | 13.6  | 1759.4        | 20.6  | 104.2 |
| $\omega$ B97X-D /aug-cc-pVTZ       | 3622.9        | 70.4  | 3281.2        | 13.0  | 1759.3        | 20.6  | 104.0 |
| <b>Experimental</b>                | <b>3552.5</b> |       | <b>3268.2</b> |       | <b>1738.7</b> |       |       |

**Table S-2b.** Rotational constants of 25DMF (in MHz) predicted at various levels of theory. The differences between the calculated and the experimental values (in MHz) are given as  $\Delta A$ ,  $\Delta B$  and  $\Delta C$ .  $\Sigma$  is the sum of the absolute values of  $\Delta A$ ,  $\Delta B$  and  $\Delta C$ .

| Method/Basis set             | <i>A</i> | $\Delta A$ | <i>B</i> | $\Delta B$ | <i>C</i> | $\Delta C$ | $\Sigma$ |
|------------------------------|----------|------------|----------|------------|----------|------------|----------|
| B3LYP-D3/6-31G(d,p)          | 6159.6   | -1.1       | 2124.5   | -6.3       | 1611.4   | -3.6       | 11.0     |
| B3LYP-D3/6-31+G(d,p)         | 6143.3   | -17.4      | 2121.0   | -9.8       | 1608.3   | -6.7       | 33.8     |
| B3LYP-D3/6-31++G(d,p)        | 6143.9   | -16.8      | 2121.0   | -9.8       | 1608.3   | -6.7       | 33.3     |
| B3LYP-D3/6-311G(d,p)         | 6179.8   | 19.1       | 2129.6   | -1.2       | 1615.6   | 0.6        | 20.9     |
| B3LYP-D3/6-311+G(d,p)        | 6179.8   | 19.1       | 2126.6   | -4.2       | 1613.9   | -1.1       | 24.4     |
| B3LYP-D3/6-311++G(d,p)       | 6179.8   | 19.1       | 2126.6   | -4.2       | 1613.9   | -1.1       | 24.3     |
| B3LYP-D3/6-311G(2d,2p)       | 6211.0   | 50.3       | 2132.7   | 1.9        | 1619.4   | 4.4        | 56.6     |
| B3LYP-D3/6-311+G(2d,2p)      | 6211.9   | 51.2       | 2130.1   | -0.7       | 1618.0   | 3.0        | 54.8     |
| B3LYP-D3/6-311++G(2d,2p)     | 6212.1   | 51.4       | 2130.0   | -0.8       | 1617.9   | 2.9        | 55.1     |
| B3LYP-D3/6-311G(df,pd)       | 6202.6   | 41.9       | 2134.9   | 4.1        | 1620.1   | 5.1        | 51.1     |
| B3LYP-D3/6-311+G(df,pd)      | 6202.5   | 41.8       | 2132.6   | 1.8        | 1618.8   | 3.8        | 47.4     |
| B3LYP-D3/6-311++G(df,pd)     | 6202.2   | 41.5       | 2132.6   | 1.8        | 1618.9   | 3.9        | 47.2     |
| B3LYP-D3/6-311G(2df,2pd)     | 6217.6   | 56.9       | 2136.2   | 5.4        | 1621.9   | 6.9        | 69.2     |
| B3LYP-D3/6-311+G(2df,2pd)    | 6216.0   | 55.3       | 2134.1   | 3.3        | 1620.5   | 5.5        | 64.1     |
| B3LYP-D3/6-311++G(2df,2pd)   | 6216.1   | 55.4       | 2134.0   | 3.2        | 1620.5   | 5.5        | 64.2     |
| B3LYP-D3/6-311G(3df,3pd)     | 6212.8   | 52.1       | 2137.8   | 7.0        | 1622.4   | 7.4        | 66.5     |
| B3LYP-D3/6-311+G(3df,3pd)    | 6216.0   | 55.3       | 2134.9   | 4.1        | 1621.0   | 6.0        | 65.4     |
| B3LYP-D3/6-311++G(3df,3pd)   | 6216.0   | 55.3       | 2134.9   | 4.1        | 1621.0   | 6.0        | 65.4     |
| B3LYP-D3/cc-pVDZ             | 6136.2   | -24.5      | 2121.3   | -9.5       | 1608.3   | -6.7       | 40.8     |
| B3LYP-D3/aug-cc-pVDZ         | 6142.1   | -18.6      | 2117.6   | -13.2      | 1606.5   | -8.5       | 40.3     |
| B3LYP-D3/cc-pVTZ             | 6217.1   | 56.4       | 2133.4   | 2.6        | 1620.2   | 5.2        | 64.2     |
| B3LYP-D3/aug-cc-pVTZ         | 6214.8   | 54.1       | 2133.3   | 2.5        | 1620.0   | 5.0        | 61.6     |
|                              |          |            |          |            |          |            |          |
| B3LYP-D3BJ/6-31G(d,p)        | 6162.0   | 1.3        | 2124.2   | -6.6       | 1611.3   | -3.7       | 11.7     |
| B3LYP-D3BJ/6-31+G(d,p)       | 6148.6   | -12.1      | 2119.7   | -11.1      | 1607.9   | -7.1       | 30.2     |
| B3LYP-D3BJ/6-31++G(d,p)      | 6149.2   | -11.5      | 2119.7   | -11.1      | 1608.0   | -7.0       | 29.6     |
| B3LYP-D3BJ/6-311G(d,p)       | 6184.9   | 24.2       | 2128.1   | -2.7       | 1615.1   | 0.1        | 27.0     |
| B3LYP-D3BJ/6-311+G(d,p)      | 6185.0   | 24.3       | 2125.2   | -5.6       | 1613.5   | -1.5       | 31.5     |
| B3LYP-D3BJ/6-311++G(d,p)     | 6184.9   | 24.2       | 2125.2   | -5.6       | 1613.5   | -1.5       | 31.4     |
| B3LYP-D3BJ/6-311G(2d,2p)     | 6213.4   | 52.7       | 2132.0   | 1.2        | 1619.1   | 4.1        | 58.1     |
| B3LYP-D3BJ/6-311+G(2d,2p)    | 6216.9   | 56.2       | 2128.6   | -2.2       | 1617.4   | 2.4        | 60.8     |
| B3LYP-D3BJ/6-311++G(2d,2p)   | 6217.2   | 56.5       | 2128.5   | -2.3       | 1617.4   | 2.4        | 61.1     |
| B3LYP-D3BJ/6-311G(df,pd)     | 6207.5   | 46.8       | 2133.2   | 2.4        | 1619.5   | 4.5        | 53.7     |
| B3LYP-D3BJ/6-311+G(df,pd)    | 6207.5   | 46.8       | 2131.0   | 0.2        | 1618.3   | 3.3        | 50.3     |
| B3LYP-D3BJ/6-311++G(df,pd)   | 6207.3   | 46.6       | 2131.1   | 0.3        | 1618.3   | 3.3        | 50.2     |
| B3LYP-D3BJ/6-311G(2df,2pd)   | 6222.4   | 61.7       | 2134.6   | 3.8        | 1621.2   | 6.2        | 71.7     |
| B3LYP-D3BJ/6-311+G(2df,2pd)  | 6221.0   | 60.3       | 2132.5   | 1.7        | 1619.9   | 4.9        | 66.9     |
| B3LYP-D3BJ/6-311++G(2df,2pd) | 6221.1   | 60.4       | 2132.4   | 1.6        | 1619.9   | 4.9        | 67.0     |
| B3LYP-D3BJ/6-311G(3df,3pd)   | 6217.5   | 56.8       | 2136.1   | 5.3        | 1621.8   | 6.8        | 68.9     |



|                                  |        |       |        |       |        |       |       |
|----------------------------------|--------|-------|--------|-------|--------|-------|-------|
| B3LYP-D3BJ/6-311+G(3df,3pd)      | 6221.0 | 60.3  | 2133.3 | 2.5   | 1620.4 | 5.4   | 68.1  |
| B3LYP-D3BJ/6-311++G(3df,3pd)     | 6221.0 | 60.3  | 2133.3 | 2.5   | 1620.4 | 5.4   | 68.2  |
| B3LYP-D3BJ/cc-pVDZ               | 6141.2 | -19.5 | 2120.0 | -10.8 | 1607.9 | -7.1  | 37.4  |
| B3LYP-D3BJ/aug-cc-pVDZ           | 6147.6 | -13.1 | 2116.3 | -14.5 | 1606.2 | -8.8  | 36.4  |
| B3LYP-D3BJ/cc-pVTZ               | 6219.5 | 58.8  | 2132.8 | 2.0   | 1620.0 | 5.0   | 65.7  |
| B3LYP-D3BJ/aug-cc-pVTZ           | 6219.8 | 59.1  | 2131.7 | 0.9   | 1619.4 | 4.4   | 64.5  |
|                                  |        |       |        |       |        |       |       |
| CAM-B3LYP-D3BJ/6-31G(d,p)        | 6203.4 | 42.7  | 2140.2 | 9.4   | 1623.3 | 8.3   | 60.4  |
| CAM-B3LYP-D3BJ/6-31+G(d,p)       | 6186.5 | 25.8  | 2137.1 | 6.3   | 1620.5 | 5.5   | 37.6  |
| CAM-B3LYP-D3BJ/6-31++G(d,p)      | 6187.0 | 26.3  | 2137.1 | 6.3   | 1620.5 | 5.5   | 38.1  |
| CAM-B3LYP-D3BJ/6-311G(d,p)       | 6226.3 | 65.6  | 2144.5 | 13.7  | 1627.3 | 12.3  | 91.6  |
| CAM-B3LYP-D3BJ/6-311+G(d,p)      | 6223.7 | 63.0  | 2142.7 | 11.9  | 1626.2 | 11.2  | 86.1  |
| CAM-B3LYP-D3BJ/6-311++G(d,p)     | 6223.7 | 63.0  | 2142.7 | 11.9  | 1626.2 | 11.2  | 86.1  |
| CAM-B3LYP-D3BJ/6-311G(2d,2p)     | 6257.4 | 96.7  | 2148.2 | 17.4  | 1631.4 | 16.4  | 130.5 |
| CAM-B3LYP-D3BJ/6-311+G(2d,2p)    | 6257.5 | 96.8  | 2145.9 | 15.1  | 1630.1 | 15.1  | 127.0 |
| CAM-B3LYP-D3BJ/6-311++G(2d,2p)   | 6258.4 | 97.7  | 2145.8 | 15.0  | 1630.1 | 15.1  | 127.8 |
| CAM-B3LYP-D3BJ/6-311G(df,pd)     | 6246.5 | 85.8  | 2150.3 | 19.5  | 1632.0 | 17.0  | 122.3 |
| CAM-B3LYP-D3BJ/6-311+G(df,pd)    | 6248.8 | 88.1  | 2147.2 | 16.4  | 1630.4 | 15.4  | 119.9 |
| CAM-B3LYP-D3BJ/6-311++G(df,pd)   | 6248.6 | 87.9  | 2147.3 | 16.5  | 1630.4 | 15.4  | 119.8 |
| CAM-B3LYP-D3BJ/6-311G(2df,2pd)   | 6263.7 | 103.0 | 2151.3 | 20.5  | 1633.7 | 18.7  | 142.2 |
| CAM-B3LYP-D3BJ/6-311+G(2df,2pd)  | 6264.1 | 103.4 | 2148.4 | 17.6  | 1632.0 | 17.0  | 138.0 |
| CAM-B3LYP-D3BJ/6-311++G(2df,2pd) | 6264.4 | 103.7 | 2148.3 | 17.5  | 1632.0 | 17.0  | 138.2 |
| CAM-B3LYP-D3BJ/6-311G(3df,3pd)   | 6258.6 | 97.9  | 2152.9 | 22.1  | 1634.2 | 19.2  | 139.2 |
| CAM-B3LYP-D3BJ/6-311+G(3df,3pd)  | 6263.6 | 102.9 | 2149.2 | 18.4  | 1632.5 | 17.5  | 138.8 |
| CAM-B3LYP-D3BJ/6-311++G(3df,3pd) | 6263.6 | 102.9 | 2149.2 | 18.4  | 1632.5 | 17.5  | 138.8 |
| CAM-B3LYP-D3BJ/cc-pVDZ           | 6180.3 | 19.6  | 2137.0 | 6.2   | 1620.3 | 5.3   | 31.1  |
| CAM-B3LYP-D3BJ/aug-cc-pVDZ       | 6186.7 | 26.0  | 2133.6 | 2.8   | 1618.7 | 3.7   | 32.5  |
| CAM-B3LYP-D3BJ/cc-pVTZ           | 6263.0 | 102.3 | 2148.6 | 17.8  | 1632.1 | 17.1  | 137.2 |
| CAM-B3LYP-D3BJ/aug-cc-pVTZ       | 6263.3 | 102.6 | 2147.6 | 16.8  | 1631.5 | 16.5  | 135.9 |
| CCSD/cc-pVDZ                     | 6076.8 | -83.9 | 2112.8 | -18.0 | 1599.6 | -15.4 | 117.2 |
|                                  |        |       |        |       |        |       |       |
| M06-2X/6-31G(d,p)                | 6186.6 | 25.9  | 2141.4 | 10.6  | 1622.9 | 7.9   | 44.4  |
| M06-2X/6-31+G(d,p)               | 6171.5 | 10.8  | 2138.6 | 7.8   | 1620.4 | 5.4   | 24.0  |
| M06-2X/6-31++G(d,p)              | 6171.8 | 11.1  | 2138.6 | 7.8   | 1620.4 | 5.4   | 24.4  |
| M06-2X/6-311G(d,p)               | 6205.9 | 45.2  | 2144.2 | 13.4  | 1625.8 | 10.8  | 69.4  |
| M06-2X/6-311+G(d,p)              | 6203.3 | 42.6  | 2142.4 | 11.6  | 1624.7 | 9.7   | 63.8  |
| M06-2X/6-311++G(d,p)             | 6203.4 | 42.7  | 2142.4 | 11.6  | 1624.6 | 9.6   | 63.9  |
| M06-2X/6-311G(2d,2p)             | 6237.4 | 76.7  | 2146.8 | 16.0  | 1629.3 | 14.3  | 106.9 |
| M06-2X/6-311+G(2d,2p)            | 6238.1 | 77.4  | 2144.3 | 13.5  | 1628.0 | 13.0  | 103.9 |
| M06-2X/6-311++G(2d,2p)           | 6235.8 | 75.1  | 2145.3 | 14.5  | 1628.4 | 13.4  | 102.9 |
| M06-2X/6-311G(df,pd)             | 6222.2 | 61.5  | 2149.0 | 18.2  | 1629.6 | 14.6  | 94.3  |
| M06-2X/6-311+G(df,pd)            | 6222.4 | 61.7  | 2146.9 | 16.1  | 1628.5 | 13.5  | 91.4  |
| M06-2X/6-311++G(df,pd)           | 6222.2 | 61.5  | 2147.0 | 16.2  | 1628.5 | 13.5  | 91.2  |
| M06-2X/6-311G(2df,2pd)           | 6240.8 | 80.1  | 2149.8 | 19.0  | 1631.3 | 16.3  | 115.4 |
| M06-2X/6-311+G(2df,2pd)          | 6240.3 | 79.6  | 2147.6 | 16.8  | 1630.0 | 15.0  | 111.4 |

|                          |        |       |        |      |        |      |       |
|--------------------------|--------|-------|--------|------|--------|------|-------|
| M06-2X/6-311++G(2df,2pd) | 6240.5 | 79.8  | 2147.6 | 16.8 | 1630.0 | 15.0 | 111.5 |
| M06-2X/6-311G(3df,3pd)   | 6235.8 | 75.1  | 2151.3 | 20.5 | 1631.8 | 16.8 | 112.4 |
| M06-2X/6-311+G(3df,3pd)  | 6239.6 | 78.9  | 2148.4 | 17.6 | 1630.4 | 15.4 | 111.8 |
| M06-2X/6-311++G(3df,3pd) | 6239.5 | 78.8  | 2148.4 | 17.6 | 1630.4 | 15.4 | 111.7 |
| M06-2X/cc-pVDZ           | 6166.8 | 6.1   | 2139.5 | 8.7  | 1620.8 | 5.8  | 20.7  |
| M06-2X/aug-cc-pVDZ       | 6175.0 | 14.3  | 2134.9 | 4.1  | 1618.7 | 3.7  | 22.0  |
| M06-2X/cc-pVTZ           | 6239.2 | 78.5  | 2147.3 | 16.5 | 1629.8 | 14.8 | 109.8 |
| M06-2X/aug-cc-pVTZ       | 6242.0 | 81.3  | 2146.5 | 15.7 | 1629.5 | 14.5 | 111.5 |
|                          |        |       |        |      |        |      |       |
| MN15/6-31G(d,p)          | 6187.1 | 26.4  | 2132.5 | 1.7  | 1617.8 | 2.8  | 30.9  |
| MN15/6-31+G(d,p)         | 6169.4 | 8.7   | 2129.6 | -1.2 | 1615.1 | 0.1  | 10.0  |
| MN15/6-31++G(d,p)        | 6170.0 | 9.3   | 2129.5 | -1.3 | 1615.1 | 0.1  | 10.7  |
| MN15/6-311G(d,p)         | 6213.9 | 53.2  | 2139.4 | 8.6  | 1623.6 | 8.6  | 70.4  |
| MN15/6-311+G(d,p)        | 6210.9 | 50.2  | 2137.6 | 6.8  | 1622.4 | 7.4  | 64.3  |
| MN15/6-311++G(d,p)       | 6211.2 | 50.5  | 2137.6 | 6.8  | 1622.4 | 7.4  | 64.6  |
| MN15/6-311G(2d,2p)       | 6235.5 | 74.8  | 2142.7 | 11.9 | 1626.8 | 11.8 | 98.6  |
| MN15/6-311+G(2d,2p)      | 6235.0 | 74.3  | 2140.3 | 9.5  | 1625.4 | 10.4 | 94.3  |
| MN15/6-311++G(2d,2p)     | 6235.5 | 74.8  | 2140.2 | 9.4  | 1625.4 | 10.4 | 94.6  |
| MN15/6-311G(df,pd)       | 6237.5 | 76.8  | 2145.6 | 14.8 | 1628.7 | 13.7 | 105.3 |
| MN15/6-311+G(df,pd)      | 6237.4 | 76.7  | 2143.2 | 12.4 | 1627.3 | 12.3 | 101.3 |
| MN15/6-311++G(df,pd)     | 6237.2 | 76.5  | 2143.2 | 12.4 | 1627.3 | 12.3 | 101.2 |
| MN15/6-311G(2df,2pd)     | 6242.9 | 82.2  | 2146.0 | 15.2 | 1629.2 | 14.2 | 111.5 |
| MN15/6-311+G(2df,2pd)    | 6241.6 | 80.9  | 2143.7 | 12.9 | 1627.8 | 12.8 | 106.6 |
| MN15/6-311++G(2df,2pd)   | 6241.9 | 81.2  | 2143.7 | 12.9 | 1627.8 | 12.8 | 106.9 |
| MN15/6-311G(3df,3pd)     | 6246.1 | 85.4  | 2147.5 | 16.7 | 1630.2 | 15.2 | 117.3 |
| MN15/6-311+G(3df,3pd)    | 6249.9 | 89.2  | 2144.1 | 13.3 | 1628.6 | 13.6 | 116.1 |
| MN15/6-311++G(3df,3pd)   | 6249.8 | 89.1  | 2144.2 | 13.4 | 1628.6 | 13.6 | 116.1 |
| MN15/cc-pVDZ             | 6168.1 | 7.4   | 2132.5 | 1.7  | 1616.8 | 1.8  | 10.9  |
| MN15/aug-cc-pVDZ         | 6176.7 | 16.0  | 2128.9 | -1.9 | 1615.4 | 0.4  | 18.3  |
| MN15/cc-pVTZ             | 6246.1 | 85.4  | 2143.3 | 12.5 | 1627.9 | 12.9 | 110.7 |
| MN15/aug-cc-pVTZ         | 6246.8 | 86.1  | 2144.4 | 13.6 | 1628.6 | 13.6 | 113.3 |
|                          |        |       |        |      |        |      |       |
| MP2/6-31G(d,p)           | 6128.8 | -31.9 | 2132.4 | 1.6  | 1613.6 | -1.4 | 34.9  |
| MP2/6-31+G(d,p)          | 6113.4 | -47.3 | 2125.8 | -5.0 | 1608.9 | -6.1 | 58.4  |
| MP2/6-31++G(d,p)         | 6114.4 | -46.3 | 2125.6 | -5.2 | 1608.9 | -6.1 | 57.6  |
| MP2/6-311G(d,p)          | 6118.5 | -42.2 | 2133.2 | 2.4  | 1613.7 | -1.3 | 46.0  |
| MP2/6-311+G(d,p)         | 6112.5 | -48.2 | 2129.3 | -1.5 | 1611.1 | -3.9 | 53.6  |
| MP2/6-311++G(d,p)        | 6112.5 | -48.2 | 2129.2 | -1.6 | 1611.0 | -4.0 | 53.7  |
| MP2/6-311G(2d,2p)        | 6162.4 | 1.7   | 2134.7 | 3.9  | 1617.1 | 2.1  | 7.8   |
| MP2/6-311+G(2d,2p)       | 6162.0 | 1.3   | 2131.1 | 0.3  | 1615.0 | 0.0  | 1.6   |
| MP2/6-311++G(2d,2p)      | 6162.4 | 1.7   | 2131.0 | 0.2  | 1615.1 | 0.1  | 2.0   |
| MP2/6-311G(df,pd)        | 6163.2 | 2.5   | 2147.8 | 17.0 | 1625.0 | 10.0 | 29.6  |
| MP2/6-311+G(df,pd)       | 6157.1 | -3.6  | 2143.5 | 12.7 | 1622.2 | 7.2  | 23.5  |
| MP2/6-311++G(df,pd)      | 6156.8 | -3.9  | 2143.5 | 12.7 | 1622.1 | 7.1  | 23.8  |
| MP2/6-311G(2df,2pd)      | 6181.2 | 20.5  | 2148.2 | 17.4 | 1626.2 | 11.2 | 49.1  |

|                                 |        |        |        |       |        |       |       |
|---------------------------------|--------|--------|--------|-------|--------|-------|-------|
| MP2/6-311+G(2df,2pd)            | 6178.4 | 17.7   | 2144.0 | 13.2  | 1623.7 | 8.7   | 39.6  |
| MP2/6-311++G(2df,2pd)           | 6178.2 | 17.5   | 2144.0 | 13.2  | 1623.7 | 8.7   | 39.5  |
| MP2/6-311G(3df,3pd)             | 6159.2 | -1.5   | 2149.3 | 18.5  | 1625.4 | 10.4  | 30.4  |
| MP2/6-311+G(3df,3pd)            | 6162.9 | 2.2    | 2144.6 | 13.8  | 1623.0 | 8.0   | 24.0  |
| MP2/6-311++G(3df,3pd)           | 6162.7 | 2.0    | 2144.7 | 13.9  | 1623.0 | 8.0   | 23.9  |
| MP2/cc-pVDZ                     | 6057.3 | -103.4 | 2118.6 | -12.2 | 1601.5 | -13.5 | 129.2 |
| MP2/aug-cc-pVDZ                 | 6041.5 | -119.2 | 2105.6 | -25.2 | 1593.0 | -22.0 | 166.5 |
| MP2/cc-pVTZ                     | 6171.0 | 10.3   | 2141.6 | 10.8  | 1621.8 | 6.8   | 27.8  |
| MP2/aug-cc-pVTZ                 | 6159.5 | -1.2   | 2140.1 | 9.3   | 1620.2 | 5.2   | 15.8  |
|                                 |        |        |        |       |        |       |       |
| PBE0/6-31G(d,p)                 | 6189.6 | 28.9   | 2143.9 | 13.1  | 1624.5 | 9.5   | 51.5  |
| PBE0/6-31+G(d,p)                | 6178.0 | 17.3   | 2140.6 | 9.8   | 1622.0 | 7.0   | 34.1  |
| PBE0/6-31++G(d,p)               | 6178.2 | 17.5   | 2140.7 | 9.9   | 1622.0 | 7.0   | 34.3  |
| PBE0/6-311G(d,p)                | 6211.8 | 51.1   | 2148.7 | 17.9  | 1628.8 | 13.8  | 82.7  |
| PBE0/6-311+G(d,p)               | 6210.9 | 50.2   | 2146.3 | 15.5  | 1627.4 | 12.4  | 78.0  |
| PBE0/6-311++G(d,p)              | 6210.6 | 49.9   | 2146.3 | 15.5  | 1627.4 | 12.4  | 77.7  |
| PBE0/6-311G(2d,2p)              | 6237.5 | 76.8   | 2151.9 | 21.1  | 1632.3 | 17.3  | 115.1 |
| PBE0/6-311+G(2d,2p)             | 6240.1 | 79.4   | 2148.8 | 18.0  | 1630.7 | 15.7  | 113.1 |
| PBE0/6-311++G(2d,2p)            | 6237.3 | 76.6   | 2149.6 | 18.8  | 1631.0 | 16.0  | 111.4 |
| PBE0/6-311G(df,pd)              | 6227.3 | 66.6   | 2154.2 | 23.4  | 1633.0 | 18.0  | 107.9 |
| PBE0/6-311+G(df,pd)             | 6229.0 | 68.3   | 2151.3 | 20.5  | 1631.5 | 16.5  | 105.2 |
| PBE0/6-311++G(df,pd)            | 6228.6 | 67.9   | 2151.3 | 20.5  | 1631.5 | 16.5  | 104.9 |
| PBE0/6-311G(2df,2pd)            | 6243.1 | 82.4   | 2154.7 | 23.9  | 1634.3 | 19.3  | 125.7 |
| PBE0/6-311+G(2df,2pd)           | 6243.7 | 83.0   | 2151.9 | 21.1  | 1632.7 | 17.7  | 121.9 |
| PBE0/6-311++G(2df,2pd)          | 6243.9 | 83.2   | 2151.9 | 21.1  | 1632.7 | 17.7  | 122.0 |
| PBE0/6-311G(3df,3pd)            | 6236.9 | 76.2   | 2156.4 | 25.6  | 1634.8 | 19.8  | 121.6 |
| PBE0/6-311+G(3df,3pd)           | 6242.6 | 81.9   | 2152.9 | 22.1  | 1633.2 | 18.2  | 122.1 |
| PBE0/6-311++G(3df,3pd)          | 6242.6 | 81.9   | 2152.8 | 22.0  | 1633.2 | 18.2  | 122.2 |
| PBE0/cc-pVDZ                    | 6172.2 | 11.5   | 2142.1 | 11.3  | 1622.7 | 7.7   | 30.5  |
| PBE0/aug-cc-pVDZ                | 6177.7 | 17.0   | 2136.6 | 5.8   | 1619.9 | 4.9   | 27.7  |
| PBE0/cc-pVTZ                    | 6240.6 | 79.9   | 2151.6 | 20.8  | 1632.4 | 17.4  | 118.1 |
| PBE0/aug-cc-pVTZ                | 6241.0 | 80.3   | 2150.7 | 19.9  | 1631.9 | 16.9  | 117.1 |
|                                 |        |        |        |       |        |       |       |
| $\omega$ B97X-D/6-31G(d,p)      | 6196.6 | 35.9   | 2139.5 | 8.7   | 1622.5 | 7.5   | 52.1  |
| $\omega$ B97X-D/6-31+G(d,p)     | 6181.1 | 20.4   | 2137.7 | 6.9   | 1620.5 | 5.5   | 32.8  |
| $\omega$ B97X-D/6-31++G(d,p)    | 6181.4 | 20.7   | 2137.7 | 6.9   | 1620.6 | 5.6   | 33.1  |
| $\omega$ B97X-D/6-311G(d,p)     | 6219.3 | 58.6   | 2144.1 | 13.3  | 1626.8 | 11.8  | 83.7  |
| $\omega$ B97X-D/6-311+G(d,p)    | 6216.9 | 56.2   | 2142.2 | 11.4  | 1625.5 | 10.5  | 78.1  |
| $\omega$ B97X-D/6-311++G(d,p)   | 6216.8 | 56.1   | 2142.2 | 11.4  | 1625.5 | 10.5  | 78.0  |
| $\omega$ B97X-D/6-311G(2d,2p)   | 6247.8 | 87.1   | 2147.4 | 16.6  | 1630.4 | 15.4  | 119.2 |
| $\omega$ B97X-D/6-311+G(2d,2p)  | 6248.6 | 87.9   | 2144.9 | 14.1  | 1629.1 | 14.1  | 116.1 |
| $\omega$ B97X-D/6-311++G(2d,2p) | 6246.4 | 85.7   | 2145.9 | 15.1  | 1629.5 | 14.5  | 115.2 |
| $\omega$ B97X-D/6-311G(df,pd)   | 6237.5 | 76.8   | 2149.6 | 18.8  | 1631.1 | 16.1  | 111.7 |
| $\omega$ B97X-D/6-311+G(df,pd)  | 6237.6 | 76.9   | 2147.3 | 16.5  | 1629.8 | 14.8  | 108.2 |
| $\omega$ B97X-D/6-311++G(df,pd) | 6237.3 | 76.6   | 2147.4 | 16.6  | 1629.8 | 14.8  | 108.0 |

|                                   |               |      |               |      |               |      |       |
|-----------------------------------|---------------|------|---------------|------|---------------|------|-------|
| $\omega$ B97X-D/6-311G(2df,2pd)   | 6254.4        | 93.7 | 2150.4        | 19.6 | 1632.6        | 17.6 | 130.9 |
| $\omega$ B97X-D/6-311+G(2df,2pd)  | 6253.4        | 92.7 | 2148.2        | 17.4 | 1631.3        | 16.3 | 126.3 |
| $\omega$ B97X-D/6-311++G(2df,2pd) | 6253.6        | 92.9 | 2148.2        | 17.4 | 1631.2        | 16.2 | 126.5 |
| $\omega$ B97X-D/6-311G(3df,3pd)   | 6249.2        | 88.5 | 2152.1        | 21.3 | 1633.2        | 18.2 | 128.1 |
| $\omega$ B97X-D/6-311+G(3df,3pd)  | 6252.7        | 92.0 | 2149.3        | 18.5 | 1631.9        | 16.9 | 127.4 |
| $\omega$ B97X-D/6-311++G(3df,3pd) | 6252.8        | 92.1 | 2149.3        | 18.5 | 1631.8        | 16.8 | 127.4 |
| $\omega$ B97X-D/cc-pVDZ           | 6174.9        | 14.2 | 2136.4        | 5.6  | 1619.6        | 4.6  | 24.5  |
| $\omega$ B97X-D/aug-cc-pVDZ       | 6180.5        | 19.8 | 2132.4        | 1.6  | 1617.7        | 2.7  | 24.1  |
| $\omega$ B97X-D/cc-pVTZ           | 6253.7        | 93.0 | 2148.8        | 18.0 | 1631.6        | 16.6 | 127.6 |
| $\omega$ B97X-D/aug-cc-pVTZ       | 6254.4        | 93.7 | 2148.1        | 17.3 | 1631.3        | 16.3 | 127.4 |
| <b>Experimental</b>               | <b>6160.7</b> |      | <b>2130.8</b> |      | <b>1615.0</b> |      |       |

**Table S-3.** Coefficients of Fourier expansion for the one-dimensional potential energy curves of 23DMF given in Figure 2 calculated at the B3LYP-D3BJ/6-311++G(d,p) and MP2/6-311++G(d,p) levels of theory. The potential is expanded as  $V(\alpha) = \sum_{i=0}^n a_i f_i$ .

| <b>B3LYP-D3BJ/6-311++G(d,p)</b> |                        |                        |                        |                        |
|---------------------------------|------------------------|------------------------|------------------------|------------------------|
|                                 | <b>2-Me</b>            |                        | <b>3-Me</b>            |                        |
| $f_i$                           | $a_i / \text{Hartree}$ | $a_i / \text{cm}^{-1}$ | $a_i / \text{Hartree}$ | $a_i / \text{cm}^{-1}$ |
| 1                               | -308.7687900           |                        | -308.7689020           |                        |
| cos(3 $\alpha$ )                | -0.000634845           | -139.3                 | 0.000511936            | 112.4                  |
| cos(6 $\alpha$ )                | 0.000040516            | 8.9                    | 0.000028873            | 6.3                    |
| cos(9 $\alpha$ )                | -0.000004116           | -0.9                   | 0.000003487            | 0.8                    |
| <b>MP2/6-311++G(d,p)</b>        |                        |                        |                        |                        |
|                                 | <b>2-Me</b>            |                        | <b>3-Me</b>            |                        |
| $f_i$                           | $a_i / \text{Hartree}$ | $a_i / \text{cm}^{-1}$ | $a_i / \text{Hartree}$ | $a_i / \text{cm}^{-1}$ |
| 1                               | -307.8391596           |                        | -307.8392166           |                        |
| cos(3 $\alpha$ )                | -0.000538787           | -118.3                 | 0.000400957            | 88.0                   |
| cos(6 $\alpha$ )                | 0.000165559            | 36.3                   | 0.000096843            | 21.3                   |
| cos(9 $\alpha$ )                |                        |                        | 0.000035251            | 7.7                    |
| cos(12 $\alpha$ )               | 0.000012299            | 2.7                    | -0.000013924           | 3.1                    |
| cos(15 $\alpha$ )               | -0.000026088           | -5.7                   | -0.000016006           | 3.5                    |
| sin(3 $\alpha$ )                | -0.000011470           | -2.5                   | 0.000056708            | 12.4                   |
| sin(6 $\alpha$ )                | 0.000021587            | 4.7                    | 0.000027179            | 6.0                    |
| sin(9 $\alpha$ )                | -0.000022940           | 5.0                    | -0.000029066           | -6.5                   |
| sin(12 $\alpha$ )               | 0.000021587            | 4.7                    | -0.000025735           | -5.6                   |
| sin(15 $\alpha$ )               | -0.000011470           | 2.5                    |                        |                        |

**Table S-4.** Coefficients of Fourier expansion for the two-dimensional potential energy curves of 23DMF given in Figure 3 calculated at the B3LYP-D3BJ/6-311++G(d,p) and MP2/6-311++G(d,p) levels of theory. The potential is expanded as  $V(\alpha) = \sum_{i=0}^n a_i f_i$ .

| i | $f_i$                            | B3LYP-D3BJ      |                          | MP2             |                          |
|---|----------------------------------|-----------------|--------------------------|-----------------|--------------------------|
|   |                                  | $a_i$ / Hartree | $a_i$ / $\text{cm}^{-1}$ | $a_i$ / Hartree | $a_i$ / $\text{cm}^{-1}$ |
| 0 | 1                                | -308.7472860    |                          | -307.8388284    |                          |
| 1 | $\cos(3\alpha_1)$                | -0.000455361    | -99.9                    | -0.000360726    | -79.2                    |
| 2 | $\cos(3\alpha_2)$                | -0.000575129    | -126.2                   | -0.000496203    | -108.9                   |
| 3 | $\cos(6\alpha_1)$                | 0.000021623     | 4.7                      | 0.000057630     | 12.6                     |
| 4 | $\cos(6\alpha_2)$                | 0.000031669     | 7.0                      | 0.000119520     | 26.2                     |
| 5 | $\cos(3\alpha_1)\cos(3\alpha_2)$ | -0.000066875    | -14.7                    | -0.000043560    | -9.6                     |
| 6 | $\sin(3\alpha_1)\sin(3\alpha_2)$ | 0.000112630     | 24.7                     |                 |                          |

**Table S-5.** Observed frequencies ( $\nu_{\text{obs}}$ ) of 23DMF. The  $\nu_{\text{obs}} - \nu_{\text{calc}}$  residuals are obtained with the *XIAM* program.

| $J''$       | $K_a''$ | $K_c''$ | $J'$        | $K_a'$ | $K_c'$ | Species | $\nu_{\text{obs.}}$ | $\nu_{\text{obs.}} - \nu_{\text{calc.}}$ |
|-------------|---------|---------|-------------|--------|--------|---------|---------------------|------------------------------------------|
| Upper level |         |         | Lower level |        |        |         | MHz                 | <i>XIAM</i> / kHz                        |
| 1           | 0       | 1       | 0           | 0      | 0      | (00)    | 5007.7056           | 0.1                                      |
| 1           | 0       | 1       | 0           | 0      | 0      | (01)    | 5007.0709           | 3.8                                      |
| 1           | 0       | 1       | 0           | 0      | 0      | (10)    | 5006.3497           | -5.7                                     |
| 1           | 0       | 1       | 0           | 0      | 0      | (11)    | 5004.9383           | 0.6                                      |
| 1           | 0       | 1       | 0           | 0      | 0      | (12)    | 5006.5130           | 2.1                                      |
| 2           | 0       | 2       | 1           | 0      | 1      | (00)    | 8734.6061           | 0.3                                      |
| 2           | 0       | 2       | 1           | 0      | 1      | (01)    | 8731.5693           | -2.3                                     |
| 2           | 0       | 2       | 1           | 0      | 1      | (10)    | 8734.3046           | -3.8                                     |
| 2           | 0       | 2       | 1           | 0      | 1      | (11)    | 8732.0179           | -2.7                                     |
| 2           | 0       | 2       | 1           | 0      | 1      | (12)    | 8730.5238           | 0.3                                      |
| 2           | 0       | 2       | 1           | 1      | 1      | (00)    | 8448.8540           | 1.2                                      |
| 2           | 0       | 2       | 1           | 1      | 1      | (01)    | 8452.2120           | 7.4                                      |
| 2           | 0       | 2       | 1           | 1      | 1      | (10)    | 8447.6841           | -4.8                                     |
| 2           | 0       | 2       | 1           | 1      | 1      | (11)    | 8449.3678           | 0.7                                      |
| 2           | 0       | 2       | 1           | 1      | 1      | (12)    | 8452.7408           | 2.1                                      |
| 2           | 1       | 2       | 1           | 0      | 1      | (00)    | 8771.0139           | 0.4                                      |
| 2           | 1       | 2       | 1           | 0      | 1      | (01)    | 8766.8892           | -4.3                                     |
| 2           | 1       | 2       | 1           | 0      | 1      | (10)    | 8770.9331           | 0.5                                      |
| 2           | 1       | 2       | 1           | 0      | 1      | (11)    | 8767.8768           | -3.6                                     |
| 2           | 1       | 2       | 1           | 0      | 1      | (12)    | 8765.7244           | -4.0                                     |
| 2           | 1       | 1       | 1           | 1      | 0      | (00)    | 11545.5514          | 3.1                                      |
| 2           | 1       | 1       | 1           | 1      | 0      | (01)    | 11541.0427          | 8.8                                      |
| 2           | 1       | 1       | 1           | 1      | 0      | (10)    | 11541.4622          | -2.2                                     |
| 2           | 1       | 1       | 1           | 1      | 0      | (11)    | 11535.8461          | 3.0                                      |
| 2           | 1       | 1       | 1           | 1      | 0      | (12)    | 11538.0994          | 6.2                                      |
| 2           | 1       | 2       | 1           | 1      | 1      | (00)    | 8485.2612           | 0.6                                      |
| 2           | 1       | 2       | 1           | 1      | 1      | (01)    | 8487.5318           | 5.4                                      |
| 2           | 1       | 2       | 1           | 1      | 1      | (10)    | 8484.3075           | -5.5                                     |
| 2           | 1       | 2       | 1           | 1      | 1      | (11)    | 8485.2268           | -0.2                                     |
| 2           | 1       | 2       | 1           | 1      | 1      | (12)    | 8487.9443           | 0.6                                      |
| 2           | 2       | 0       | 1           | 1      | 1      | (00)    | 15213.7471          | 7.2                                      |
| 2           | 2       | 0       | 1           | 1      | 1      | (01)    | 15226.3413          | -7.0                                     |
| 2           | 2       | 0       | 1           | 1      | 1      | (10)    | 15212.3393          | 6.5                                      |
| 2           | 2       | 0       | 1           | 1      | 1      | (11)    | 15218.8536          | -4.8                                     |
| 2           | 2       | 0       | 1           | 1      | 1      | (12)    | 15230.9914          | -6.2                                     |
| 2           | 2       | 1       | 1           | 1      | 0      | (00)    | 12402.7955          | 1.5                                      |
| 2           | 2       | 1       | 1           | 1      | 0      | (01)    | 12375.0302          | -14.7                                    |
| 2           | 2       | 1       | 1           | 1      | 0      | (10)    | 12400.7607          | -17.1                                    |
| 2           | 2       | 1       | 1           | 1      | 0      | (11)    | 12380.0449          | -1.3                                     |

|   |   |   |   |   |   |      |            |       |
|---|---|---|---|---|---|------|------------|-------|
| 2 | 2 | 1 | 1 | 1 | 0 | (12) | 12366.0049 | -3.7  |
| 2 | 1 | 1 | 2 | 0 | 2 | (00) | 4626.8373  | -4.2  |
| 2 | 1 | 1 | 2 | 0 | 2 | (01) | 4627.0705  | 8.1   |
| 2 | 1 | 1 | 2 | 0 | 2 | (10) | 4623.7699  | 0.4   |
| 2 | 1 | 1 | 2 | 0 | 2 | (11) | 4622.0581  | 2.1   |
| 2 | 1 | 1 | 2 | 0 | 2 | (12) | 4625.9565  | 4.7   |
| 2 | 1 | 1 | 2 | 1 | 2 | (00) | 4590.4422  | 8.5   |
| 2 | 1 | 1 | 2 | 1 | 2 | (10) | 4587.1451  | -0.2  |
| 2 | 1 | 1 | 2 | 1 | 2 | (11) | 4586.1999  | 3.8   |
| 2 | 1 | 1 | 2 | 1 | 2 | (12) | 4590.7526  | 5.7   |
| 2 | 2 | 1 | 2 | 0 | 2 | (00) | 5484.0897  | 2.4   |
| 2 | 2 | 1 | 2 | 0 | 2 | (01) | 5461.0591  | -14.2 |
| 2 | 2 | 1 | 2 | 0 | 2 | (10) | 5483.0793  | -3.5  |
| 2 | 2 | 1 | 2 | 0 | 2 | (11) | 5466.2567  | -2.6  |
| 2 | 2 | 1 | 2 | 0 | 2 | (12) | 5453.8621  | -5.1  |
| 2 | 2 | 1 | 2 | 1 | 2 | (00) | 5447.6672  | -12.3 |
| 2 | 2 | 1 | 2 | 1 | 2 | (10) | 5446.4526  | -6.1  |
| 2 | 2 | 1 | 2 | 1 | 2 | (11) | 5430.3971  | -2.2  |
| 2 | 2 | 1 | 2 | 1 | 2 | (12) | 5418.6587  | -3.5  |
| 3 | 0 | 3 | 2 | 0 | 2 | (00) | 12117.7028 | 4.1   |
| 3 | 0 | 3 | 2 | 0 | 2 | (01) | 12115.7690 | 3.8   |
| 3 | 0 | 3 | 2 | 0 | 2 | (10) | 12117.1817 | -3.9  |
| 3 | 0 | 3 | 2 | 0 | 2 | (11) | 12115.3963 | -2.7  |
| 3 | 0 | 3 | 2 | 0 | 2 | (12) | 12115.0982 | -2.7  |
| 3 | 0 | 3 | 2 | 1 | 2 | (00) | 12081.2954 | 4.5   |
| 3 | 0 | 3 | 2 | 1 | 2 | (01) | 12080.4489 | 5.5   |
| 3 | 0 | 3 | 2 | 1 | 2 | (10) | 12080.5571 | -4.3  |
| 3 | 0 | 3 | 2 | 1 | 2 | (11) | 12079.5373 | -1.8  |
| 3 | 0 | 3 | 2 | 1 | 2 | (12) | 12079.8946 | -1.4  |
| 3 | 1 | 3 | 2 | 0 | 2 | (00) | 12120.6303 | 3.7   |
| 3 | 1 | 3 | 2 | 0 | 2 | (01) | 12118.5841 | 3.9   |
| 3 | 1 | 3 | 2 | 0 | 2 | (10) | 12120.1341 | -4.5  |
| 3 | 1 | 3 | 2 | 0 | 2 | (11) | 12118.2628 | -2.4  |
| 3 | 1 | 3 | 2 | 0 | 2 | (12) | 12117.9100 | -3.0  |
| 3 | 1 | 2 | 2 | 1 | 1 | (00) | 15702.0590 | -1.2  |
| 3 | 1 | 2 | 2 | 1 | 1 | (01) | 15694.5858 | -3.2  |
| 3 | 1 | 2 | 2 | 1 | 1 | (10) | 15700.5406 | -6.3  |
| 3 | 1 | 2 | 2 | 1 | 1 | (11) | 15694.3881 | -3.3  |
| 3 | 1 | 2 | 2 | 1 | 1 | (12) | 15691.7631 | -4.4  |
| 3 | 1 | 3 | 2 | 1 | 2 | (00) | 12084.2237 | 4.8   |
| 3 | 1 | 3 | 2 | 1 | 2 | (01) | 12083.2634 | 5.1   |
| 3 | 1 | 3 | 2 | 1 | 2 | (10) | 12083.5112 | -3.2  |
| 3 | 1 | 3 | 2 | 1 | 2 | (11) | 12082.4034 | -1.9  |
| 3 | 1 | 3 | 2 | 1 | 2 | (12) | 12082.7063 | -1.8  |
| 3 | 2 | 2 | 2 | 1 | 1 | (00) | 15880.3260 | -7.4  |



|   |   |   |   |   |   |      |            |       |
|---|---|---|---|---|---|------|------------|-------|
| 3 | 2 | 2 | 2 | 1 | 1 | (01) | 15867.5387 | -8.4  |
| 3 | 2 | 2 | 2 | 1 | 1 | (10) | 15879.8328 | -8.6  |
| 3 | 2 | 2 | 2 | 1 | 1 | (11) | 15869.9290 | -5.5  |
| 3 | 2 | 2 | 2 | 1 | 1 | (12) | 15864.1213 | -7.6  |
| 3 | 2 | 1 | 2 | 2 | 0 | (00) | 17928.4892 | 5.5   |
| 3 | 2 | 1 | 2 | 2 | 0 | (01) | 17915.8294 | 5.4   |
| 3 | 2 | 1 | 2 | 2 | 0 | (10) | 17921.3404 | 2.4   |
| 3 | 2 | 1 | 2 | 2 | 0 | (11) | 17910.2164 | 6.3   |
| 3 | 2 | 1 | 2 | 2 | 0 | (12) | 17907.2531 | 12.1  |
| 3 | 2 | 2 | 2 | 2 | 1 | (00) | 15023.0937 | 6.1   |
| 3 | 2 | 2 | 2 | 2 | 1 | (01) | 15033.5503 | 14.3  |
| 3 | 2 | 2 | 2 | 2 | 1 | (10) | 15020.5274 | -0.5  |
| 3 | 2 | 2 | 2 | 2 | 1 | (11) | 15025.7309 | -0.4  |
| 3 | 2 | 2 | 2 | 2 | 1 | (12) | 15036.2154 | 1.9   |
| 3 | 3 | 0 | 2 | 2 | 1 | (00) | 21893.3969 | 9.8   |
| 3 | 3 | 0 | 2 | 2 | 1 | (10) | 21892.6824 | 11.5  |
| 3 | 3 | 1 | 2 | 2 | 0 | (00) | 19640.0102 | 2.1   |
| 3 | 3 | 1 | 2 | 2 | 0 | (01) | 19566.5849 | -27.8 |
| 3 | 3 | 1 | 2 | 2 | 0 | (10) | 19635.4850 | -26.4 |
| 3 | 3 | 1 | 2 | 2 | 0 | (11) | 19583.7755 | 11.2  |
| 3 | 3 | 1 | 2 | 2 | 0 | (12) | 19541.0555 | 9.7   |
| 3 | 1 | 2 | 3 | 0 | 3 | (01) | 8205.8771  | -9.0  |
| 3 | 1 | 2 | 3 | 0 | 3 | (10) | 8207.1260  | -4.8  |
| 3 | 1 | 2 | 3 | 0 | 3 | (11) | 8201.0500  | 1.7   |
| 3 | 1 | 2 | 3 | 0 | 3 | (12) | 8202.6217  | 3.4   |
| 3 | 1 | 2 | 3 | 1 | 3 | (00) | 8208.2769  | 1.8   |
| 3 | 1 | 2 | 3 | 1 | 3 | (01) | 8203.0739  | 2.8   |
| 3 | 1 | 2 | 3 | 1 | 3 | (10) | 8204.1768  | -1.1  |
| 3 | 1 | 2 | 3 | 1 | 3 | (11) | 8198.1838  | 1.7   |
| 3 | 1 | 2 | 3 | 1 | 3 | (12) | 8199.8096  | 3.3   |
| 3 | 2 | 2 | 3 | 0 | 3 | (00) | 8389.4743  | -1.8  |
| 3 | 2 | 2 | 3 | 0 | 3 | (01) | 8378.8421  | -2.1  |
| 3 | 2 | 2 | 3 | 0 | 3 | (10) | 8386.4237  | -1.5  |
| 3 | 2 | 2 | 3 | 0 | 3 | (11) | 8376.5913  | -0.2  |
| 3 | 2 | 2 | 3 | 0 | 3 | (12) | 8374.9796  | -0.1  |
| 3 | 2 | 2 | 3 | 1 | 3 | (00) | 8386.5473  | -0.9  |
| 3 | 2 | 2 | 3 | 1 | 3 | (01) | 8376.0256  | -3.6  |
| 3 | 2 | 2 | 3 | 1 | 3 | (10) | 8383.4695  | -2.7  |
| 3 | 2 | 2 | 3 | 1 | 3 | (11) | 8373.7246  | -0.7  |
| 3 | 2 | 2 | 3 | 1 | 3 | (12) | 8372.1685  | 0.8   |
| 3 | 2 | 1 | 3 | 2 | 2 | (00) | 4186.1912  | -4.8  |
| 3 | 2 | 1 | 3 | 2 | 2 | (01) | 4195.3545  | -3.9  |
| 3 | 2 | 1 | 3 | 2 | 2 | (10) | 4182.3771  | 5.9   |
| 3 | 2 | 1 | 3 | 2 | 2 | (11) | 4187.7137  | 2.7   |
| 3 | 2 | 1 | 3 | 2 | 2 | (12) | 4195.4261  | 7.0   |

|   |   |   |   |   |   |      |            |       |
|---|---|---|---|---|---|------|------------|-------|
| 4 | 0 | 4 | 3 | 0 | 3 | (00) | 15579.0114 | 5.7   |
| 4 | 0 | 4 | 3 | 0 | 3 | (01) | 15577.4576 | 6.2   |
| 4 | 0 | 4 | 3 | 0 | 3 | (10) | 15578.3870 | -4.9  |
| 4 | 0 | 4 | 3 | 0 | 3 | (11) | 15576.8461 | -2.9  |
| 4 | 0 | 4 | 3 | 0 | 3 | (12) | 15576.8237 | -2.7  |
| 4 | 0 | 4 | 3 | 1 | 3 | (00) | 15576.0880 | 10.3  |
| 4 | 0 | 4 | 3 | 1 | 3 | (01) | 15574.6352 | -1.2  |
| 4 | 0 | 4 | 3 | 1 | 3 | (10) | 15575.4348 | -4.1  |
| 4 | 0 | 4 | 3 | 1 | 3 | (11) | 15573.9881 | 5.4   |
| 4 | 0 | 4 | 3 | 1 | 3 | (12) | 15574.0171 | 2.8   |
| 4 | 1 | 4 | 3 | 0 | 3 | (00) | 15579.2017 | 1.0   |
| 4 | 1 | 4 | 3 | 0 | 3 | (01) | 15577.6448 | 7.6   |
| 4 | 1 | 4 | 3 | 0 | 3 | (10) | 15578.5824 | -6.7  |
| 4 | 1 | 4 | 3 | 0 | 3 | (11) | 15577.0342 | -4.5  |
| 4 | 1 | 4 | 3 | 0 | 3 | (12) | 15577.0086 | -3.9  |
| 4 | 1 | 3 | 3 | 1 | 2 | (00) | 19000.8980 | 5.5   |
| 4 | 1 | 3 | 3 | 1 | 2 | (01) | 18994.3387 | 3.3   |
| 4 | 1 | 3 | 3 | 1 | 2 | (10) | 18999.5276 | -6.5  |
| 4 | 1 | 3 | 3 | 1 | 2 | (11) | 18993.6658 | -3.3  |
| 4 | 1 | 3 | 3 | 1 | 2 | (12) | 18992.2620 | -4.0  |
| 4 | 1 | 4 | 3 | 1 | 3 | (00) | 15576.2785 | 5.7   |
| 4 | 1 | 4 | 3 | 1 | 3 | (01) | 15574.8284 | 6.2   |
| 4 | 1 | 4 | 3 | 1 | 3 | (10) | 15575.6311 | -5.0  |
| 4 | 1 | 4 | 3 | 1 | 3 | (11) | 15574.1695 | -2.9  |
| 4 | 1 | 4 | 3 | 1 | 3 | (12) | 15574.1969 | -3.5  |
| 4 | 1 | 3 | 3 | 2 | 2 | (00) | 18822.6267 | 7.3   |
| 4 | 1 | 3 | 3 | 2 | 2 | (01) | 18821.3851 | 7.9   |
| 4 | 1 | 3 | 3 | 2 | 2 | (10) | 18820.2357 | -3.9  |
| 4 | 1 | 3 | 3 | 2 | 2 | (11) | 18818.1247 | -1.2  |
| 4 | 1 | 3 | 3 | 2 | 2 | (12) | 18819.9039 | -0.7  |
| 4 | 2 | 3 | 3 | 1 | 2 | (00) | 19021.2014 | 4.9   |
| 4 | 2 | 3 | 3 | 1 | 2 | (01) | 19013.8612 | 1.9   |
| 4 | 2 | 3 | 3 | 1 | 2 | (10) | 19020.0036 | -6.5  |
| 4 | 2 | 3 | 3 | 1 | 2 | (11) | 19013.5438 | -2.1  |
| 4 | 2 | 3 | 3 | 1 | 2 | (12) | 19011.7646 | -4.2  |
| 4 | 2 | 2 | 3 | 2 | 1 | (00) | 22625.1514 | 1.6   |
| 4 | 2 | 2 | 3 | 2 | 1 | (01) | 22614.0141 | -1.5  |
| 4 | 2 | 2 | 3 | 2 | 1 | (10) | 22621.3457 | -13.0 |
| 4 | 2 | 2 | 3 | 2 | 1 | (11) | 22611.1627 | -4.6  |
| 4 | 2 | 2 | 3 | 2 | 1 | (12) | 22609.3290 | -5.0  |
| 4 | 2 | 3 | 3 | 2 | 2 | (00) | 18842.9315 | 8.1   |
| 4 | 2 | 3 | 3 | 2 | 2 | (01) | 18840.9077 | 6.5   |
| 4 | 2 | 3 | 3 | 2 | 2 | (10) | 18840.7127 | -3.1  |
| 4 | 2 | 3 | 3 | 2 | 2 | (11) | 18838.0010 | -1.6  |
| 4 | 2 | 3 | 3 | 2 | 2 | (12) | 18839.4065 | -1.0  |

|   |   |   |   |   |   |      |            |       |
|---|---|---|---|---|---|------|------------|-------|
| 4 | 3 | 1 | 3 | 3 | 0 | (00) | 24120.9007 | 11.7  |
| 4 | 3 | 1 | 3 | 3 | 0 | (01) | 24088.7909 | -16.9 |
| 4 | 3 | 1 | 3 | 3 | 0 | (10) | 24110.3379 | -6.6  |
| 4 | 3 | 1 | 3 | 3 | 0 | (11) | 24089.3759 | 9.2   |
| 4 | 3 | 1 | 3 | 3 | 0 | (12) | 24067.8721 | 20.9  |
| 4 | 3 | 2 | 3 | 3 | 1 | (00) | 21424.9761 | 7.6   |
| 4 | 3 | 2 | 3 | 3 | 1 | (01) | 21459.2873 | 14.1  |
| 4 | 3 | 2 | 3 | 3 | 1 | (10) | 21421.2473 | 3.3   |
| 4 | 3 | 2 | 3 | 3 | 1 | (11) | 21440.8154 | -5.3  |
| 4 | 3 | 2 | 3 | 3 | 1 | (12) | 21469.7021 | -2.3  |
| 4 | 1 | 3 | 4 | 1 | 4 | (00) | 11632.8992 | 4.3   |
| 4 | 1 | 3 | 4 | 1 | 4 | (01) | 11622.5745 | -9.8  |
| 4 | 1 | 3 | 4 | 1 | 4 | (10) | 11628.0716 | -4.1  |
| 4 | 1 | 3 | 4 | 1 | 4 | (11) | 11617.6802 | 1.5   |
| 4 | 1 | 3 | 4 | 1 | 4 | (12) | 11617.8742 | 2.3   |
| 4 | 2 | 3 | 4 | 0 | 4 | (00) | 11653.3982 | 4.4   |
| 4 | 2 | 3 | 4 | 0 | 4 | (01) | 11642.2843 | -9.7  |
| 4 | 2 | 3 | 4 | 0 | 4 | (10) | 11648.7447 | -4.4  |
| 4 | 2 | 3 | 4 | 0 | 4 | (11) | 11637.7464 | 1.1   |
| 4 | 2 | 3 | 4 | 0 | 4 | (12) | 11637.5630 | 2.2   |
| 4 | 2 | 2 | 4 | 1 | 3 | (00) | 7988.7320  | 5.6   |
| 4 | 2 | 2 | 4 | 1 | 3 | (01) | 7987.9883  | -8.4  |
| 4 | 2 | 2 | 4 | 1 | 3 | (10) | 7983.4855  | -4.9  |
| 4 | 2 | 2 | 4 | 1 | 3 | (11) | 7980.7511  | -1.2  |
| 4 | 2 | 2 | 4 | 1 | 3 | (12) | 7984.8495  | 1.0   |
| 4 | 2 | 3 | 4 | 1 | 4 | (00) | 11653.2040 | 5.2   |
| 4 | 2 | 3 | 4 | 1 | 4 | (01) | 11642.1068 | -1.3  |
| 4 | 2 | 3 | 4 | 1 | 4 | (10) | 11648.5496 | -2.3  |
| 4 | 2 | 3 | 4 | 1 | 4 | (11) | 11637.5569 | 1.4   |
| 4 | 2 | 3 | 4 | 1 | 4 | (12) | 11637.3752 | 0.4   |
| 4 | 2 | 2 | 4 | 2 | 3 | (00) | 7968.4271  | 4.7   |
| 4 | 2 | 2 | 4 | 2 | 3 | (01) | 7968.4736  | 0.8   |
| 4 | 2 | 2 | 4 | 2 | 3 | (10) | 7963.0102  | -4.1  |
| 4 | 2 | 2 | 4 | 2 | 3 | (11) | 7960.8748  | -0.7  |
| 4 | 2 | 2 | 4 | 2 | 3 | (12) | 7965.3485  | 2.9   |
| 4 | 3 | 2 | 4 | 1 | 3 | (00) | 8500.0670  | -2.4  |
| 4 | 3 | 2 | 4 | 1 | 3 | (01) | 8484.0370  | -6.1  |
| 4 | 3 | 2 | 4 | 1 | 3 | (10) | 8497.5407  | -8.2  |
| 4 | 3 | 2 | 4 | 1 | 3 | (12) | 8479.0263  | 2.5   |
| 5 | 0 | 5 | 4 | 0 | 4 | (00) | 19055.0201 | 7.6   |
| 5 | 0 | 5 | 4 | 0 | 4 | (01) | 19053.4954 | 7.3   |
| 5 | 0 | 5 | 4 | 0 | 4 | (10) | 19054.3789 | -5.5  |
| 5 | 0 | 5 | 4 | 0 | 4 | (11) | 19052.8560 | -4.1  |
| 5 | 0 | 5 | 4 | 0 | 4 | (12) | 19052.8560 | -4.9  |
| 5 | 0 | 5 | 4 | 1 | 4 | (00) | 19054.8341 | 16.6  |

|   |   |   |   |   |   |      |            |       |
|---|---|---|---|---|---|------|------------|-------|
| 5 | 0 | 5 | 4 | 1 | 4 | (01) | 19053.3212 | 19.0  |
| 5 | 0 | 5 | 4 | 1 | 4 | (10) | 19054.1920 | 4.8   |
| 5 | 0 | 5 | 4 | 1 | 4 | (11) | 19052.6820 | 11.6  |
| 5 | 0 | 5 | 4 | 1 | 4 | (12) | 19052.6820 | 7.2   |
| 5 | 1 | 5 | 4 | 0 | 4 | (00) | 19055.0201 | -4.1  |
| 5 | 1 | 5 | 4 | 0 | 4 | (01) | 19053.4954 | -3.8  |
| 5 | 1 | 5 | 4 | 0 | 4 | (10) | 19054.3790 | -17.4 |
| 5 | 1 | 5 | 4 | 0 | 4 | (11) | 19052.8560 | -15.5 |
| 5 | 1 | 5 | 4 | 0 | 4 | (12) | 19052.8560 | -16.0 |
| 5 | 1 | 4 | 4 | 1 | 3 | (00) | 22402.4259 | 8.8   |
| 5 | 1 | 4 | 4 | 1 | 3 | (01) | 22397.5450 | 7.6   |
| 5 | 1 | 4 | 4 | 1 | 3 | (10) | 22400.6252 | -6.2  |
| 5 | 1 | 4 | 4 | 1 | 3 | (11) | 22395.8391 | -3.5  |
| 5 | 1 | 4 | 4 | 1 | 3 | (12) | 22395.6551 | -2.4  |
| 5 | 1 | 5 | 4 | 1 | 4 | (00) | 19054.8339 | 4.7   |
| 5 | 1 | 5 | 4 | 1 | 4 | (01) | 19053.3214 | 8.1   |
| 5 | 1 | 5 | 4 | 1 | 4 | (10) | 19054.1920 | -7.1  |
| 5 | 1 | 5 | 4 | 1 | 4 | (11) | 19052.6789 | -2.9  |
| 5 | 1 | 5 | 4 | 1 | 4 | (12) | 19052.6820 | -4.0  |
| 5 | 2 | 4 | 4 | 1 | 3 | (10) | 22402.3953 | 0.5   |
| 5 | 2 | 4 | 4 | 1 | 3 | (11) | 22397.5378 | -1.7  |
| 5 | 2 | 4 | 4 | 2 | 3 | (00) | 22383.8656 | 8.4   |
| 5 | 2 | 4 | 4 | 2 | 3 | (01) | 22379.6825 | 6.8   |
| 5 | 2 | 4 | 4 | 2 | 3 | (10) | 22381.9130 | -5.6  |
| 5 | 2 | 4 | 4 | 2 | 3 | (11) | 22377.6614 | -1.3  |
| 5 | 2 | 4 | 4 | 2 | 3 | (12) | 22377.8168 | -2.2  |
| 5 | 1 | 4 | 5 | 1 | 5 | (00) | 14980.4873 | 4.6   |
| 5 | 1 | 4 | 5 | 1 | 5 | (01) | 14966.7994 | -9.0  |
| 5 | 1 | 4 | 5 | 1 | 5 | (10) | 14974.5059 | -2.0  |
| 5 | 1 | 4 | 5 | 1 | 5 | (11) | 14960.8416 | 2.0   |
| 5 | 1 | 4 | 5 | 1 | 5 | (12) | 14960.8460 | 2.5   |
| 5 | 2 | 4 | 5 | 0 | 5 | (00) | 14982.2443 | 5.8   |
| 5 | 2 | 4 | 5 | 0 | 5 | (01) | 14968.4776 | -4.0  |
| 5 | 2 | 4 | 5 | 0 | 5 | (10) | 14976.2805 | -2.8  |
| 5 | 2 | 4 | 5 | 0 | 5 | (11) | 14962.5497 | 1.9   |
| 5 | 2 | 4 | 5 | 0 | 5 | (12) | 14962.5241 | 5.1   |
| 5 | 2 | 3 | 5 | 1 | 4 | (00) | 11558.5238 | 0.7   |
| 5 | 2 | 3 | 5 | 1 | 4 | (01) | 11549.9626 | -7.9  |
| 5 | 2 | 3 | 5 | 1 | 4 | (10) | 11553.1976 | -4.0  |
| 5 | 2 | 3 | 5 | 1 | 4 | (11) | 11544.2579 | -0.4  |
| 5 | 2 | 4 | 5 | 1 | 5 | (00) | 14982.2223 | -4.5  |
| 5 | 2 | 4 | 5 | 1 | 5 | (01) | 14968.4733 | 2.8   |
| 5 | 2 | 4 | 5 | 1 | 5 | (10) | 14976.2771 | 5.6   |
| 5 | 2 | 4 | 5 | 1 | 5 | (11) | 14962.5322 | -4.3  |
| 5 | 2 | 4 | 5 | 1 | 5 | (12) | 14962.5079 | 0.1   |

|   |   |   |   |   |   |      |            |       |
|---|---|---|---|---|---|------|------------|-------|
| 5 | 2 | 3 | 5 | 2 | 4 | (00) | 11556.7784 | -0.6  |
| 5 | 2 | 3 | 5 | 2 | 4 | (01) | 11548.3042 | -4.2  |
| 5 | 2 | 3 | 5 | 2 | 4 | (10) | 11551.4338 | -4.3  |
| 5 | 2 | 3 | 5 | 2 | 4 | (11) | 11542.5638 | 2.5   |
| 5 | 2 | 3 | 5 | 2 | 4 | (12) | 11543.4249 | 2.7   |
| 5 | 3 | 3 | 5 | 1 | 4 | (00) | 11638.2343 | 5.0   |
| 5 | 3 | 3 | 5 | 1 | 4 | (01) | 11626.6344 | -4.4  |
| 5 | 3 | 3 | 5 | 1 | 4 | (10) | 11633.5693 | -2.0  |
| 5 | 3 | 3 | 5 | 1 | 4 | (11) | 11622.2942 | 0.2   |
| 5 | 3 | 3 | 5 | 1 | 4 | (12) | 11621.6704 | 3.8   |
| 5 | 3 | 2 | 5 | 3 | 3 | (00) | 7549.5896  | -20.8 |
| 5 | 3 | 2 | 5 | 3 | 3 | (01) | 7558.2846  | -23.5 |
| 5 | 3 | 2 | 5 | 3 | 3 | (10) | 7542.3639  | -15.7 |
| 5 | 3 | 2 | 5 | 3 | 3 | (11) | 7546.8626  | -17.8 |
| 5 | 3 | 2 | 5 | 3 | 3 | (12) | 7555.4144  | -11.1 |
| 5 | 4 | 2 | 5 | 2 | 3 | (00) | 8737.5919  | 12.8  |
| 5 | 4 | 2 | 5 | 2 | 3 | (01) | 8709.1625  | 1.6   |
| 5 | 4 | 2 | 5 | 2 | 3 | (10) | 8736.1727  | 4.6   |
| 5 | 4 | 2 | 5 | 2 | 3 | (11) | 8713.9808  | 14.6  |
| 5 | 4 | 2 | 5 | 2 | 3 | (12) | 8701.3945  | 16.3  |
| 6 | 0 | 6 | 5 | 0 | 5 | (00) | 22532.3670 | 8.7   |
| 6 | 0 | 6 | 5 | 0 | 5 | (01) | 22530.8385 | 9.7   |
| 6 | 0 | 6 | 5 | 0 | 5 | (10) | 22531.7221 | -6.7  |
| 6 | 0 | 6 | 5 | 0 | 5 | (11) | 22530.1958 | -3.1  |
| 6 | 0 | 6 | 5 | 0 | 5 | (12) | 22530.1958 | -4.9  |
| 6 | 0 | 6 | 5 | 1 | 5 | (00) | 22532.3534 | 6.9   |
| 6 | 0 | 6 | 5 | 1 | 5 | (01) | 22530.8253 | 7.6   |
| 6 | 0 | 6 | 5 | 1 | 5 | (10) | 22531.7074 | -9.5  |
| 6 | 0 | 6 | 5 | 1 | 5 | (11) | 22530.1829 | -4.7  |
| 6 | 0 | 6 | 5 | 1 | 5 | (12) | 22530.1829 | -6.7  |
| 6 | 1 | 6 | 5 | 0 | 5 | (00) | 22532.3670 | 8.1   |
| 6 | 1 | 6 | 5 | 0 | 5 | (01) | 22530.8385 | 9.1   |
| 6 | 1 | 6 | 5 | 0 | 5 | (10) | 22531.7221 | -7.4  |
| 6 | 1 | 6 | 5 | 0 | 5 | (11) | 22530.1958 | -3.8  |
| 6 | 1 | 6 | 5 | 0 | 5 | (12) | 22530.1958 | -5.6  |
| 6 | 1 | 6 | 5 | 1 | 5 | (00) | 22532.3534 | 6.2   |
| 6 | 1 | 6 | 5 | 1 | 5 | (01) | 22530.8253 | 6.9   |
| 6 | 1 | 6 | 5 | 1 | 5 | (10) | 22531.7074 | -10.2 |
| 6 | 1 | 6 | 5 | 1 | 5 | (11) | 22530.1829 | -5.3  |
| 6 | 1 | 6 | 5 | 1 | 5 | (12) | 22530.1829 | -7.4  |
| 6 | 1 | 5 | 6 | 1 | 6 | (00) | 18317.2160 | 5.5   |
| 6 | 1 | 5 | 6 | 1 | 6 | (10) | 18309.9881 | 3.4   |
| 6 | 1 | 5 | 6 | 1 | 6 | (11) | 18293.2707 | 9.5   |
| 6 | 1 | 5 | 6 | 1 | 6 | (12) | 18293.2512 | 3.8   |
| 6 | 2 | 5 | 6 | 0 | 6 | (00) | 18317.3453 | 5.7   |

|   |   |   |   |   |   |      |            |       |
|---|---|---|---|---|---|------|------------|-------|
| 6 | 2 | 5 | 6 | 0 | 6 | (10) | 18310.1194 | 3.8   |
| 6 | 2 | 5 | 6 | 0 | 6 | (11) | 18293.3947 | 8.7   |
| 6 | 2 | 5 | 6 | 0 | 6 | (12) | 18293.3745 | 4.7   |
| 6 | 2 | 4 | 6 | 1 | 5 | (00) | 14943.6044 | 6.5   |
| 6 | 2 | 4 | 6 | 1 | 5 | (01) | 14930.6350 | -1.5  |
| 6 | 2 | 4 | 6 | 1 | 5 | (10) | 14937.4175 | -1.1  |
| 6 | 2 | 4 | 6 | 1 | 5 | (11) | 14924.4261 | 10.8  |
| 6 | 2 | 4 | 6 | 1 | 5 | (12) | 14924.5315 | 6.6   |
| 6 | 2 | 4 | 6 | 2 | 5 | (00) | 14943.4697 | 0.2   |
| 6 | 2 | 4 | 6 | 2 | 5 | (01) | 14930.5116 | -3.6  |
| 6 | 2 | 4 | 6 | 2 | 5 | (10) | 14937.2874 | -1.0  |
| 6 | 2 | 4 | 6 | 2 | 5 | (11) | 14924.2955 | 4.3   |
| 6 | 2 | 4 | 6 | 2 | 5 | (12) | 14924.4077 | 4.6   |
| 6 | 3 | 4 | 6 | 1 | 5 | (00) | 14952.2294 | 5.2   |
| 6 | 3 | 4 | 6 | 1 | 5 | (01) | 14938.8542 | -5.5  |
| 6 | 3 | 4 | 6 | 1 | 5 | (10) | 14946.1364 | -3.4  |
| 6 | 3 | 4 | 6 | 1 | 5 | (11) | 14932.8121 | 3.1   |
| 6 | 3 | 4 | 6 | 1 | 5 | (12) | 14932.7655 | 6.5   |
| 6 | 3 | 3 | 6 | 3 | 4 | (00) | 11397.7347 | -8.7  |
| 6 | 3 | 3 | 6 | 3 | 4 | (01) | 11393.4213 | -17.6 |
| 6 | 3 | 3 | 6 | 3 | 4 | (10) | 11391.2911 | -13.6 |
| 6 | 3 | 3 | 6 | 3 | 4 | (11) | 11385.8074 | -10.7 |
| 6 | 3 | 3 | 6 | 3 | 4 | (12) | 11388.2822 | -8.4  |
| 6 | 4 | 3 | 6 | 2 | 4 | (00) | 11637.5803 | 1.2   |
| 6 | 4 | 3 | 6 | 2 | 4 | (01) | 11624.1764 | -3.0  |
| 6 | 4 | 3 | 6 | 2 | 4 | (10) | 11633.0977 | 0.8   |
| 6 | 4 | 3 | 6 | 2 | 4 | (11) | 11620.6150 | 5.2   |
| 6 | 4 | 3 | 6 | 2 | 4 | (12) | 11618.7615 | 7.2   |
